16 **Abstract (150 words limit)**

17 1300-nm three-photon calcium imaging has emerged as a useful technique to allow calcium  
18 imaging in deep brain regions. Application to large-scale neural activity imaging entails a careful  
19 balance between recording fidelity and tissue heating. We calculated and experimentally verified  
20 the excitation pulse energy to achieve *the minimum photon count* required for the detection of  
21 calcium transients in GCaMP6s-expressing neurons for 920-nm two-photon and 1320-nm three-  
22 photon excitation, respectively. Brain tissue heating by continuous three-photon imaging was  
23 simulated with Monte Carlo method and experimentally validated with immunohistochemistry.  
24 We observed increased immunoreactivity with 150 mW excitation power at 1.0- and 1.2-mm  
25 imaging depths. Based on the data, we explained how three-photon excitation achieves better  
26 calcium imaging fidelity than two-photon excitation in the deep brain and quantified the imaging  
27 depth where three-photon microscopy should be applied. Our analysis presents a translatable  
28 model for the optimization of three-photon calcium imaging based on experimentally tractable  
29 parameters.

## 30 Introduction

31 Multiphoton microscopy (MPM) combined with genetically encoded calcium indicators (GECIs) is a  
32 powerful functional imaging technique widely applied to *in vivo* neurophysiological recordings (Lin  
33 and Schnitzer, 2016; Yang and Yuste, 2017). In the mouse brain, 2-photon microscopy (2PM) has  
34 enabled activity recording from thousands of neurons with single-cell resolution (Sofroniew et al.,  
35 2016; Stirman et al., 2016; Weisenburger et al., 2019). Although 2-photon excitation (2PE) can  
36 effectively reduce out-of-focus fluorescence, the background intensity eventually becomes  
37 comparable to the signal in non-sparsely labeled samples, as the excitation power grows  
38 exponentially with imaging depth. The background not only reduces image contrast but also  
39 introduces additional noise inseparable from the true calcium transient signal, which irreversibly  
40 reduces imaging quality. In the mouse neocortex, 2PM signal-to-background ration (SBR)  
41 decreases to 1 at  $\sim 4.7$  attenuation lengths with a labeling density of  $\sim 2\%$  (Kobat et al., 2011;  
42 Theer et al., 2003; Theer and Denk, 2006)

43  
44 3-photon microscopy (3PM) has emerged as a useful tool for imaging in deep brain regions that  
45 are typically inaccessible to 2PM. Although deep calcium imaging with 2PM has been  
46 demonstrated with red-shifted calcium indicators using 1100 nm excitation, these methods suffer  
47 from limitations such as staining only a single layer of the cortical neurons (Tischbirek et al., 2015),  
48 or in the hippocampus of young mice less than 6 weeks old (Inoue et al., 2019; Kondo et al., 2017).  
49 Furthermore, the best red-shifted GECIs are currently less bright and robust than their green  
50 counterparts (e.g.,  $< 40\%$  the cross section of GCaMP6s and  $< 50\%$  sensitivity of jGCaMP7 (Dana et  
51 al., 2019, 2016)), which further limits their application to large-scale recordings. Compared to the  
52 red GECIs, the shorter 2PE wavelength (900-960 nm) for GCaMP results in more tissue scattering

53 (Jacques, 2013). Consequently, 2-photon imaging with GCaMP faces more technical challenges in  
54 the deep brain, and usually requires the removal of the superficial cortex or the insertion of  
55 penetrating optical elements (Attardo et al., 2015; Dombbeck et al., 2010; Low et al., 2014; Pilz et  
56 al., 2016). In comparison, 1300-nm 3PM has enabled activity imaging with GCaMP6 of the entire  
57 densely labeled cortex (Takasaki et al., 2019b; Yildirim et al., 2019) and the hippocampus in intact  
58 *adult* mouse brains (8-16 weeks old) (Ouzounov et al., 2017; Takasaki et al., 2019a; Weisenburger  
59 et al., 2019), because of the background suppression by 3-photon excitation (3PE) and the  
60 reduced tissue attenuation by the longer excitation wavelength (Ouzounov et al., 2017).

61  
62 Since the first demonstrations of 3PM for *in vivo* brain imaging (Horton et al., 2013; Ouzounov et  
63 al., 2017), a number of research groups have successfully adopted and developed the technology  
64 (Chen et al., 2018; Escobet-Montalbán et al., 2018; Odríguez, 2018; Perillo et al., 2017; Rowlands  
65 et al., 2017; Takasaki et al., 2019b; Weisenburger et al., 2019; Yildirim et al., 2019), propelled by  
66 the commercially available lasers and microscopes. To facilitate 3PM applications, here we  
67 provide a quantitative characterization of three-photon deep-brain calcium imaging, with a side-  
68 by-side comparison to 2PM with 920 nm excitation. Our results show that 1320-nm 3PM is  
69 advantageous in terms of both signal strength and imaging contrast in the deep cortex and  
70 beyond. Furthermore, by optimizing the important imaging parameters (e.g., pulse energy and  
71 repetition rate) to meet the signal-to-noise ratio within the power constraints, we provide a  
72 scalable strategy to push the limits of 3PM for large penetration depth and field-of-view (FOV).

73

## 74 **Results**

### 75 **Photon count provides the fundamental metric for calcium imaging quality.**

76 High-quality calcium imaging enables reliable detection of calcium transients in the presence of  
77 noise. With a photomultiplier tube as the fluorescence detector, calcium imaging can be  
78 performed at the photon shot noise limit, where the photon fluctuation noise (N) and the signal  
79 (S) obey the relation:  $N=S^{1/2}$ . Therefore, quantifying the fluorescence signal with photon counts  
80 provides the noise statistics, and allows probabilistic inference of the true underlying signal.

81 Assuming exponential decay of calcium transients, a single discriminability index ( $d'$ ), as defined  
82 by equation (1), has been derived in the past to assess the recording fidelity of a calcium transient  
83 (Wilt et al., 2013):

$$d' \approx \frac{\Delta F}{F} \sqrt{\frac{F_0 \tau}{2}} \quad (1)$$

84 where  $\tau$  is the decay time,  $\Delta F/F$  is the peak fluorescence change of a single-action-potential-  
85 induced calcium spike, and  $F_0$  is the baseline brightness of the neuron. This expression holds as  
86 long as the frame rate is high enough to sample the exponential decay of the fluorescence  
87 intensity, and a higher  $d'$  value indicates better calcium transient detection accuracy. In fact, the  
88 fidelity of calcium imaging is determined by the signal photon counts of each neuron. The  
89 *minimum photon counts* required to detect a calcium transient induced by a single action  
90 potential can be calculated at any given confidence level: using the parameters for GCaMP6s ( $\Delta F/F$   
91  $\sim 30\%$  and  $\tau \sim 2s$ ) (Chen et al., 2013),  $F_0$  is calculated to be  $\sim 100$  photons/second to achieve  $d'=3$ ,  
92 which allows 93% true detection and 7% false-positive detection rate. For large calcium transients  
93 induced by a short burst of multiple action potentials,  $F_0$  can be significantly lower since  $\Delta F/F$  is  
94 larger by the accumulation of single-action-potential  $\Delta F/F$  (Wilt et al., 2013). Given  $\Delta F/F$  and  $\tau$  of a

95 calcium indicator are fixed, the quality of calcium imaging can only be improved by increasing the  
96 baseline neuron brightness  $F_0$ , which can be achieved by varying the imaging parameters, e.g.,  
97 excitation repetition rate, pulse duration, pulse energy, focal spot size and laser dwell time on  
98 each neuron. It is clear from the above analysis that extremely high sampling rates in either pixel  
99 or frame do not improve the overall calcium transient detection accuracy since the number of  
100 photons per neuron per second is conserved regardless of the sampling scheme.

101

102 **1320-nm 3PE is more power-efficient in signal generation than 920-nm 2PE in the deep**  
103 **cortex and beyond.**

104 In general, due to the higher-order nonlinear excitation, 3PE requires higher excitation intensity at  
105 the focus in order to generate the same amount of fluorescence as 2PE. For deep tissue imaging,  
106 however, the pulse energy at the brain surface can be less for 3PE than 2PE because photons at  
107 the longer wavelength used for 3PE experience less attenuation. To quantify the difference in  
108 tissue attenuation caused by the wavelength, we imaged mouse brain vasculature uniformly  
109 labeled with fluorescein dextran and measured fluorescence signal decay as a function of depth.  
110 We centered the 3PE and 2PE excitation spectra at 1320 nm and 920 nm, respectively, since they  
111 are nearly optimal for GCaMP6 imaging, which is the focus of this study (Ouzounov et al., 2019).  
112 Through simultaneous 2PM and 3PM imaging of the same blood vessel with the same fluorescent  
113 label, we ensured the same signal collection efficiency for the two imaging modalities, and any  
114 sample fluctuation over time is eliminated. As shown in Figure 1A, the effective attenuation length  
115 (EAL) at 1320 nm in the mouse cortex is almost twice that at 920 nm ( $297 \pm 11 \mu\text{m}$  vs.  $153 \pm 10 \mu\text{m}$ ,  
116 mean  $\pm$  standard deviation,  $n=4$ , >12 weeks old mice, all males, Figure 1A and Figure 1 - figure  
117 supplement 1).

118 We measured the pulse energy required for the typical multiphoton signal strength of 0.1 photons  
119 detected per excitation pulse (Figure 1B). To generate the same amount of signal in fluorescein-  
120 labeled blood vessels located at the brain surface, 3PE requires about 15 times the pulse energy of  
121 2PE ( $1.1 \pm 0.03$  nJ vs.  $0.07 \pm 0.004$  nJ, mean  $\pm$  95% confidence interval). As the imaging depth  
122 increases, to maintain the same signal strength, the 2PE pulse energy delivered to the brain  
123 surface has to increase more rapidly than that for 3PE since 920-nm photons experience more  
124 tissue attenuation than 1320-nm photons. Eventually, 3PE becomes more power-efficient than  
125 2PE at a depth of around 750  $\mu$ m, which is defined here as the cross-over depth. The same trend  
126 can be observed in GCaMP6s labeled neurons. At the brain surface, 3PE at 1320 nm requires  $\sim$  8  
127 times the pulse energy as 2PE at 920 nm ( $1.86 \pm 0.27$  nJ vs.  $0.24 \pm 0.05$  nJ, mean  $\pm$  95% confidence  
128 interval), while in cortical layers at depth around 700  $\mu$ m, the pulse energy required for 3PE  
129 becomes comparable to that of 2PE at the brain surface. The measured ratio of the 3PE to 2PE  
130 pulse energy and the cross-over depth are in good agreement with the calculation based on  
131 typical 2PE and 3PE cross sections (Appendix 1). Our data show that, with the same repetition rate  
132 and pulse duration, 3PM is more power-efficient than 2PM when imaging in the deep cortex and  
133 beyond. In other words, even if 2PM were used to image at the same depth (e.g.,  $\sim$ 1 mm), its  
134 repetition rate will have to be reduced to the same level as 3PM (typically  $\sim$ 1 MHz) to avoid tissue  
135 heating by the average power. This result is consistent with previous studies on deep brain two-  
136 photon imaging, where the repetition rates were reduced to below 1 MHz at  $\sim$ 1 mm imaging  
137 depth (Theer et al., 2003; M. Wang et al., 2018). Although our data were measured with  
138 fluorescein and GCaMP6s, the conclusion is likely applicable to other green fluorescent dyes.

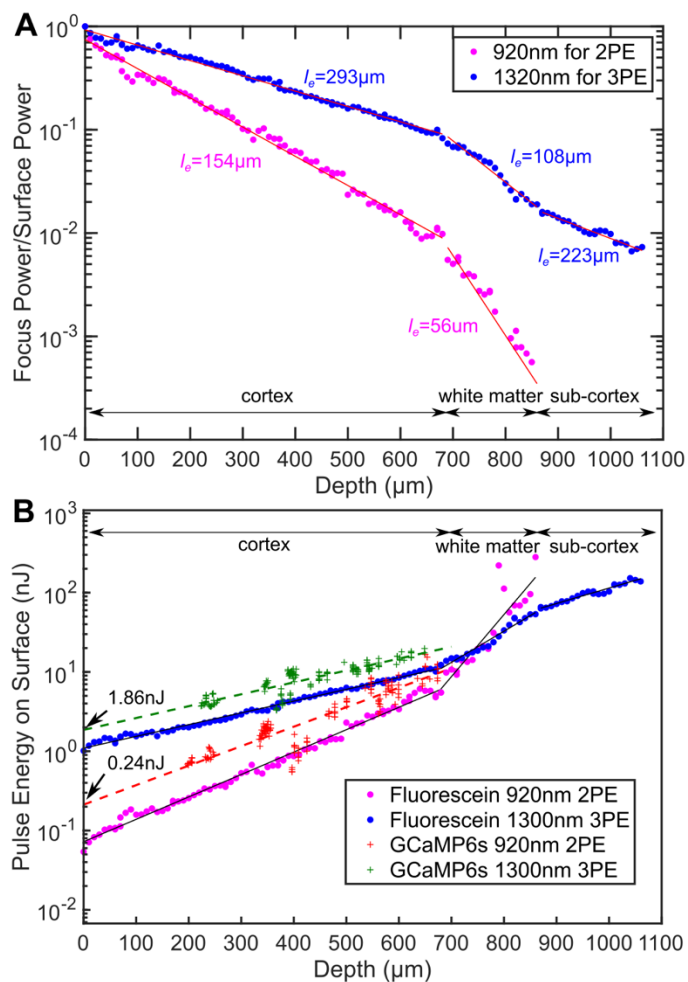

139

140

141

142

143

144

145

146

147

148

Figure 1. Comparison of the power attenuation of 1320-nm and 920-nm excitation lights and their respective 3-photon and 2-photon excitation efficiency in the mouse brain. (A) Power attenuation of 920-nm and 1320-nm excitation light in the mouse brain. The mouse brain vasculature was *uniformly* labeled with fluorescein dextran and imaged *simultaneously* by 920-nm 2PM and 1320-nm 3PM at precisely the same location. The fraction of excitation power reaching the focus from the brain surface (Focus Power/Surface Power) was calculated based on the attenuation of 2PE and 3PE signal with the imaging depth (Materials and Methods). (B) The pulse energy required at the brain surface to generate the *same* 2PE and 3PE signal strength (0.1 signal photons detected per laser pulse) at different imaging depths, measured in fluorescein-labeled blood vessels (n=1



149 shown) and GCaMP6s-labeled neurons (CamKII-tTA/tetO-GCaMP6s; n=5 mice). The signal strength  
150 is scaled to 60 fs pulse duration for both 2PE and 3PE.

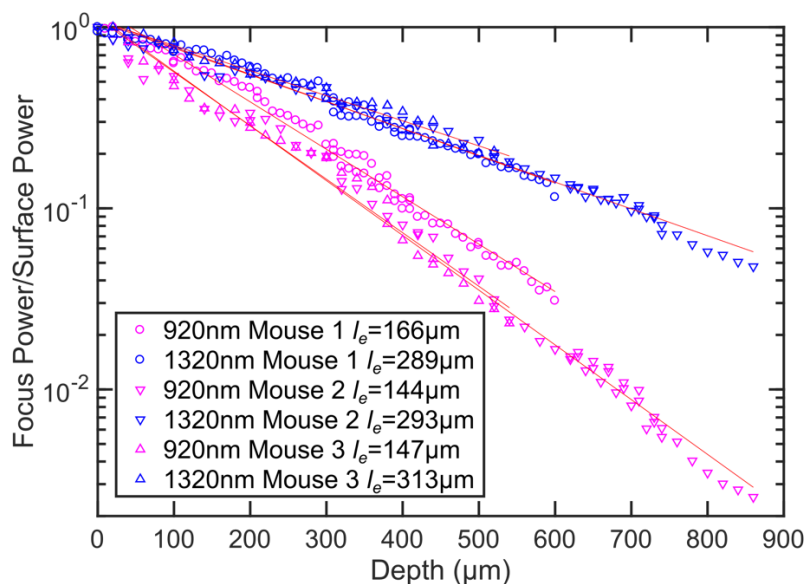

151

152 Figure 1 - figure supplement 1. Additional power attenuation curves of 920-nm and 1320-nm  
153 excitation light in the mouse neocortex (n=3, >12 weeks old mice, all males).

154

155 **1320-nm 3PM has orders of magnitude higher SBR than 920-nm 2PM for deep imaging in the**  
156 **non-sparsely labeled mouse brain.**

157 The imaging depth of 2PM is limited by the out-of-focus background in non-sparsely labeled  
158 samples (Theer and Denk, 2006). The SBR of an image is quantified as follows: the background is  
159 measured as the fluorescence intensity in structures not labeled, and the signal is the fluorescence  
160 signal within the labeled structures minus the background. For both 2PM and 3PM, the  
161 background is negligible at the sample surface, with SBR ~100 in fluorescein-labeled blood vessels  
162 (Figure 2A and Figure 2B). As the imaging depth increases beyond 600  $\mu\text{m}$  in the cortex, 920-nm  
163 2PM background starts to increase rapidly, accompanied by apparent degradation of image  
164 quality (Figure 2A and Figure 2C lower panel). Since the SBR of 2PM depends on the staining

165 density of the sample, we quantified the fractional vascular volume ( $2 \pm 1\%$ , mean  $\pm$  standard  
166 deviation) and staining inhomogeneity ( $\sim 50$ ) of the labeled blood vessels (Figure 2-figure  
167 supplement 1 – Materials and Methods). According to the theoretical calculation, the SBR of 2PM  
168 reaches 1 at  $\sim 4.7$  EALs at such a staining inhomogeneity (Theer and Denk, 2006), which is in close  
169 agreement with our *in vivo* measurement (Figure 2B). In contrast, 1320-nm 3PM does not show  
170 any increase in the background until in the white matter (Figure 2A and Figure 2B). The  
171 background reduction by 3PE was contributed by the larger EAL of the long wavelength that  
172 reduces the normalized imaging depth ( $z/\text{EAL}$ ), and the higher order of nonlinearity of 3PE that  
173 suppresses background generation in the out-of-focus volume, which plays a critical role when the  
174 2PE and 3PE used the same wavelength and have the same EAL (T. Wang et al., 2018). Large SBRs  
175 ( $> 40$ ) were reported on 3-photon imaging of mouse brain vasculature at an imaging depth of  
176 greater than 5 attenuation lengths (Liu et al., 2019). However, for the depths beyond the white  
177 matter, our measured SBR of 3PM is lower than the theoretical prediction, which may be caused  
178 by the deterioration of the point spread function due to the strong aberration introduced by the  
179 white matter. Similar behavior was also observed in through-skull imaging (T. Wang et al., 2018).

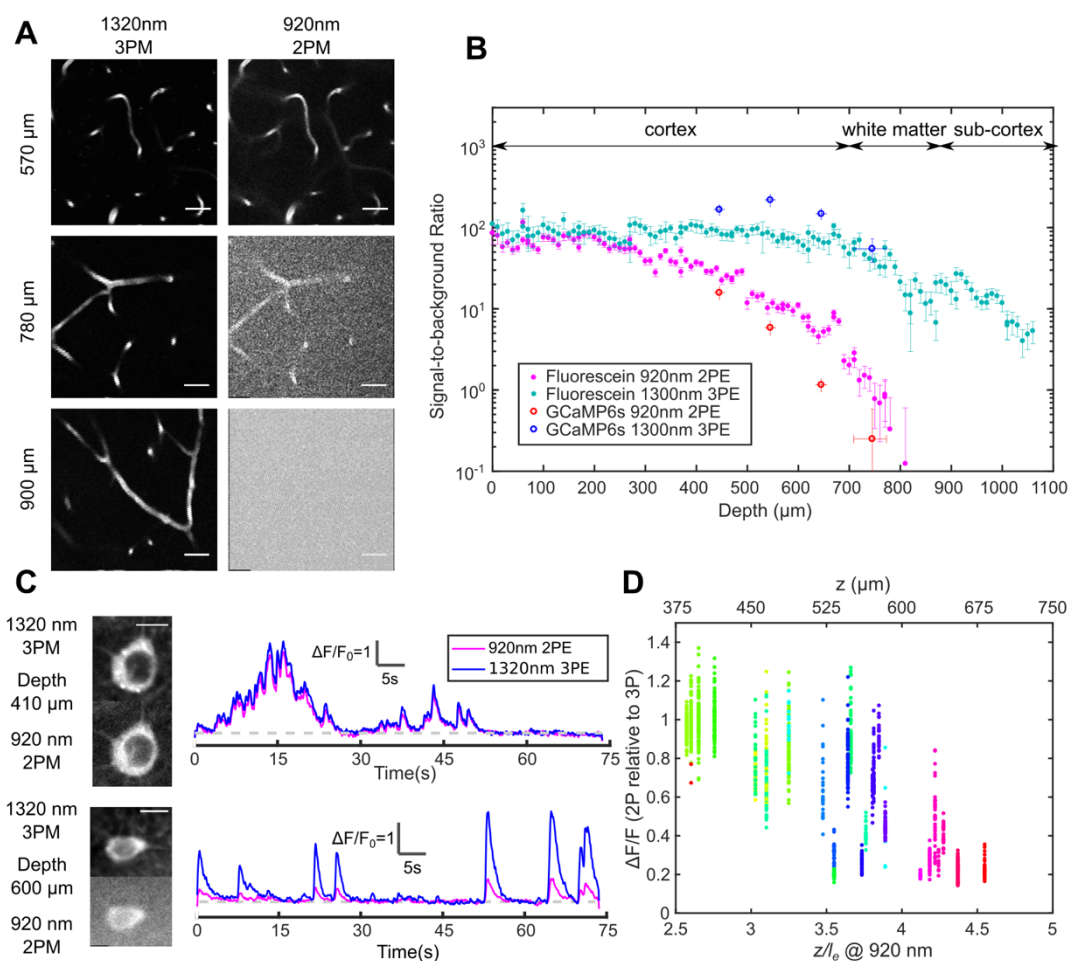

180

181 Figure 2. Comparison of signal-to-background ratio for 1320-nm 3PM and 920-nm 2PM in the non-

182 sparsely labeled mouse brain and its effect on calcium imaging sensitivity. (A) Comparison of 3PM

183 and 2PM images of fluorescein-labeled blood vessels at different depths. Scale bar 30 μm. (B) SBR

184 measured *simultaneously* by 1320-nm 3PE and 920-nm 2PE on fluorescein-labeled blood vessels

185 and GCaMP6s-labeled neurons, respectively. Each set of 3PE and 2PE comparison was performed

186 in the same mouse. All vertical error bars denote the standard deviation of SBR caused by feature

187 brightness variation, and horizontal error bars represent the depth range of the measurement. (C)

188 Images and corresponding calcium traces of a cortical L4 neuron (410 μm) and a L5 neuron (600

189 μm), simultaneously recorded by 920-nm 2PM and 1320-nm 3PM. Both traces were low-pass

190 filtered with a hamming window of a time constant 0.37 s. Scale bar, 10 μm. (D) The ratio of ΔF/F

191 calculated on simultaneously recorded 3PM and 2PM calcium traces (CamKII-tTA/tetO-GCaMP6s;  
192 n=3 mice). Each point was measured on a single calcium transient. The depth was normalized by  
193 the 2PM attenuation length at 920 nm of each animal to collapse the data better onto a single  
194 trendline. Data points from different neurons at the same depth are colored differently.

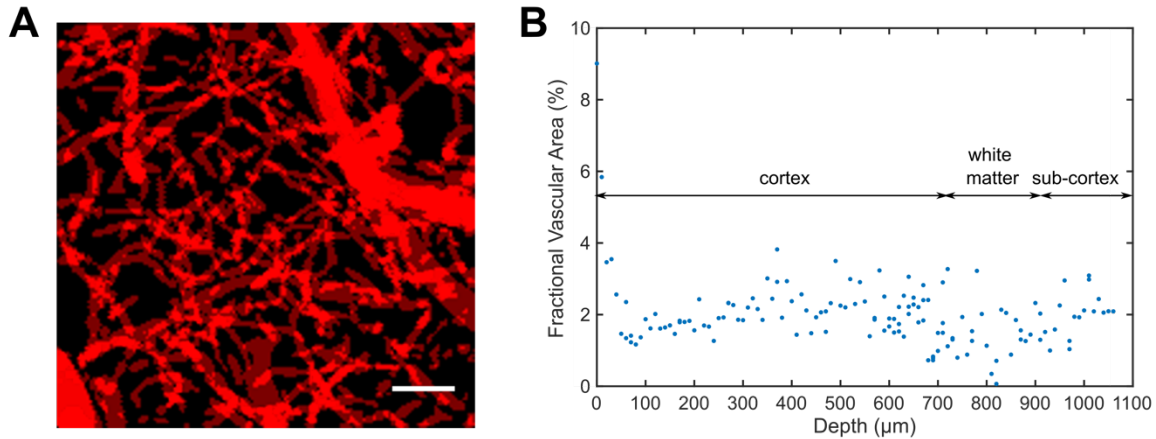

196 Figure 2-figure supplement 1. Measurement of the staining density in uniformly labeled vasculature.

197 (A) Z-projection of the identified blood vessels by summing all the XY-images in a vertical image stack  
198 (0-400  $\mu\text{m}$  deep, with 10  $\mu\text{m}$  step size). Scale bar, 30  $\mu\text{m}$ .

199 (B) The fractional vascular area in each XY-image at various depths.

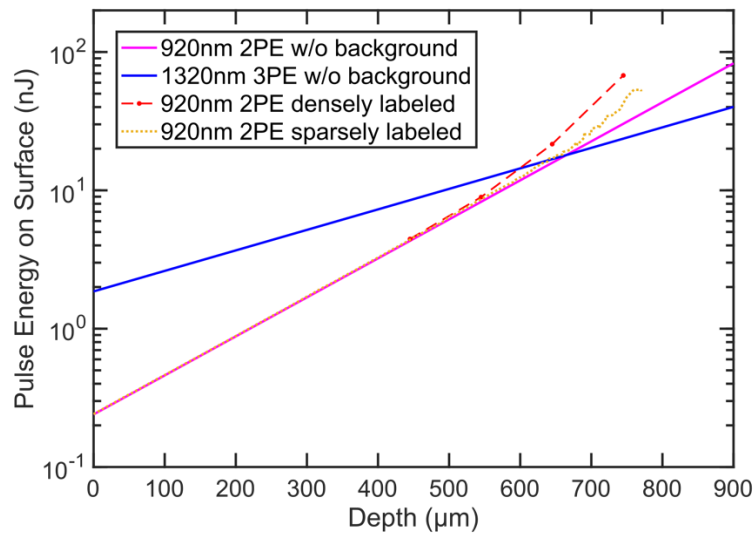

201 Figure 2-figure supplement 2. The pulse energy required at the brain surface to generate *the same*  $d'$   
202 per pulse sampling the neuron for 2PE and 3PE of GCaMP6s at different imaging depths. In the

203 absence of the background fluorescence,  $d'$  is entirely determined by signal photon counts: when a  
204 neuron is sampled by 1000 excitation pulses in 1s, it generates  $F_0 = 1000 \text{ pulses} \times 0.1 \text{ photons/}$   
205  $\text{pulse} = 100 \text{ photons/s}$ , which gives  $d' \sim 3$ . Therefore, Group '920nm 2PE w/o background' and  
206 '1320nm 3PE w/o background' exactly reproduce the pulse energy curves for *the same signal* of 0.1  
207 photons/excitation pulse (Figure 1B). Group '920nm 2PE densely labeled' and '920nm 2PE sparsely  
208 labeled' are calculated based on the SBR measured in GCaMP6s-labeled neurons and fluorescein-  
209 labeled blood vessels, respectively (Figure 2B). 1320-nm 3PE is assumed to be background-free in the  
210 mouse cortex.

211

### 212 **3PM has higher calcium imaging sensitivity and discriminability than 2PM in the deep brain.**

213 The performance of 1320-nm 3PM calcium imaging was compared to 920-nm 2PM using a time-  
214 division multiplexing scheme, which allows the essentially simultaneous recording of calcium  
215 dynamics from the same region of interest (ROI) with pixel-wise multiplexed 2PE and 3PE signals  
216 (Ouzounov et al., 2017) (Materials and Methods). From the neurons in the shallow mouse cortical  
217 layer 2/3 and 4, we obtained nearly identical calcium traces with 2PM and 3PM (Figure 2C upper  
218 panel), with a Pearson's correlation factor of  $0.98 \pm 0.01$  (mean  $\pm$  standard error, calculated from  
219 60 traces, each 75s from neurons located from 200 to 400  $\mu\text{m}$  in depth). The relative  $\Delta F/F$  of  
220 GCaMP6s measured by 1320-nm 3PM is close to that of 920-nm 2PM, with the ratio  
221  $(\Delta F/F)_{2P}/(\Delta F/F)_{3P} = 1.0 \pm 0.25$  (mean  $\pm$  standard deviation,  $n=904$  calcium transients from cells  
222 located from 240-450  $\mu\text{m}$ ), in close agreement to previous studies (Ouzounov et al., 2019, 2017;  
223 Takasaki et al., 2019a).

224

225 As the imaging depth increases, however, the 2PM background contributes to the increase of  
226 baseline fluorescence of neurons as  $F'_0 = F_0(1 + 1/SBR)$ , which reduces the apparent  $\Delta F/F$  to  
227  $(1 + 1/SBR)^{-1}$  (assuming time-invariant background). A typical comparison of 3PM and 2PM  
228 calcium traces in the deep cortex is shown in Figure 2C lower panel, and the ratios of 2PM to 3PM  
229  $\Delta F/F$  are shown in Figure 2D. In the transgenic mouse brain (CamKII-tTA/tetO-GCaMP6s) at ~ 4  
230 EALs at 920 nm, the apparent  $\Delta F/F$  measured by 2PM is approximately half of 3PM, indicating SBR  
231 ~ 1, which corroborates with the direct SBR measurement in Figure 2B. The 2P  $\Delta F/F$  deteriorates  
232 rapidly with even larger imaging depth, due to the rapid decline of SBR (e.g., Figure 2B). Similar  
233 results have been observed in other densely labeled transgenic lines (Slc17a7/ai162) by  
234 independent studies (Takasaki et al., 2019b, 2019a). The cell-to-cell variation of the ratio of 2PM  
235 to 3PM  $\Delta F/F$  is mainly caused by the difference in GCaMP expression level (i.e., dimmer cells have  
236 lower SBR than brighter cells at the same depth). Therefore, the decreasing SBR is particularly  
237 detrimental for measuring the neuronal activity of the dimmer neurons for deep brain 2PM. Even  
238 at 3 EALs (~450  $\mu\text{m}$ ), some dimmer neurons already show lower  $\Delta F/F$  for 2PM than that for 3PM  
239 (Figure 2D).

240

241 In addition to the loss of contrast, the noise accompanied by the 2PM background reduces the  
242 calcium transient detection accuracy, which is quantified by modifying the expression of  $d'$  to  
243 include the fluorescence background:

$$d' \approx \frac{\Delta F}{F_0(1 + 1/SBR)} \sqrt{\frac{F_0(1 + 1/SBR)\tau}{2}} = \frac{1}{\sqrt{1 + 1/SBR}} \frac{\Delta F}{F} \sqrt{\frac{F_0\tau}{2}} \quad (2)$$

244 For the same calcium sensitivity ( $\Delta F/F$ ) and baseline cell brightness ( $F_0$ ), the discriminability  $d'$  of  
245 calcium transients is reduced by a factor of  $(1 + 1/SBR)^{1/2}$  in the presence of the background.

246 For example, when  $SBR = 1$ , the  $d'$  value is reduced by a factor of 1.4, resulting in a lower true-  
247 positive or higher false-positive rate for spike detection. To compensate for the reduced  $d'$ ,  $F_0$   
248 needs to be increased by a factor of  $(1 + 1/SBR)$ , which can only be achieved by increasing the  
249 excitation pulse energy by a factor of  $(1 + 1/SBR)^{1/2}$  (since 2PE fluorescence  $\propto P^2$ ) or increasing  
250 the dwell time on each neuron by a factor of  $(1 + 1/SBR)$ . Consequently, the cross-over depth  
251 between 1320-nm 3PM and 920-nm 2PM for achieving the same  $d'$  with the same excitation pulse  
252 energy is at a shallower depth ( $\sim 600 \mu\text{m}$ ) than that based only on the signal strength ( $\sim 700 \mu\text{m}$ ),  
253 see Figure 1B and Figure 2-figure supplement 2. The SBR of 2PM drops even faster with depth  
254 than the exponential decay of the fluorescence signal because, in addition to the decrease of the  
255 signal, the background also increases with depth (Figure 2-figure supplement 2) (Theer et al.,  
256 2003). Therefore, 2PM imaging significantly beyond the depth where  $SBR = 1$  is impractical.

257

### 258 **Tissue heating and excitation saturation limit the average and peak power.**

259 Laser-induced tissue damage can be categorized into thermal and nonlinear damage, with distinct  
260 mechanisms and dependence on imaging parameters. Continuous heating damages the brain  
261 tissue through high temperature, which disturbs various biophysical processes (Podgorski and  
262 Ranganathan, 2016). Heating-induced damage happens in the bulk tissue and depends on the  
263 average power per illumination volume. On the other hand, nonlinear damage is caused by the  
264 strong electric field at the focal point, which is related to focal spot size, pulse energy, and pulse  
265 duration.

266

267 We used Monte Carlo method to calculate light intensity distribution and temperature rise caused  
268 by 1320-nm illumination and compared the simulation to immunohistochemistry results, following

269 previous works on 2PM brain heating assessment. The previous works showed that brain tissue  
270 damage was observed at >250 mW average power of continuous 920-nm illumination in both  
271 anesthetized and awake mice with cranial windows (NA=0.8; Linear FOV=1 mm; focal depth=250  
272  $\mu\text{m}$ ) (Podgorski and Ranganathan, 2016). In comparison, 1320-nm light experiences stronger  
273 water absorption and weaker scattering, which implies higher heat generation in a smaller  
274 volume, and therefore tissue temperature is expected to rise faster with input power (Table 2).  
275 According to our simulation, at 1 mm imaging depth, the maximum brain temperature starts to  
276 rise above the normal body temperature of 37 °C at 80 mW average power immediately after the  
277 an objective lens of 2-mm work distance (or 68 mW at the brain surface) with continuous scanning  
278 (Figure 3B and C; NA~0.75; FOV=230  $\mu\text{m}$ ). For power higher than 80 mW, the peak temperature  
279 rises at a rate of ~3 °C per 50 mW after the objective lens (Figure 3C). At low imaging power, light  
280 absorption does not raise the maximum tissue temperature but makes up for part of the heat loss  
281 through the cranial window (Podgorski and Ranganathan, 2016). As the input power keeps  
282 increasing, the temperature rises almost linearly with input power. The reason to distinguish the  
283 average power after the objective lens from that at the brain surface is that the absorption of  
284 1320-nm light by immersion water is not negligible. For objective lenses with different work  
285 distances, the average power at the brain surface needs to be re-calibrated according to the  
286 actual thickness of immersion water (Figure 3- figure supplement 1-Materials and Methods).  
287  
288 To experimentally determine the tissue heating at various average power, we immunolabeled  
289 *post mortem* brain slices of mice after the exposure to 20-minute continuous scanning with 1320-  
290 nm 3PM at two imaging depths (1 mm and 1.2 mm, Figure 3D). According to the  
291 immunohistochemistry results, no tissue response was detected by measuring heat shock protein



292 (anti HSP-70/72), microglial (anti-GFAP), or astrocytic activation (anti-Iba1) at 100 mW average  
293 power in anesthetized mice (NA=0.75; Linear FOV = 203  $\mu\text{m}$ ; n=5 mice, Figure 3- figure  
294 supplement 5); however, there is a non-zero chance (1 in 4 mice at 1 mm depth and 1 in 3 mice at  
295 1.2 mm depth) of detectable tissue response with 150 mW imaging power, based on visual  
296 inspection of the brain slices (Figure 3D) and the quantification of immunolabeling intensity  
297 (Figure 3E). The variation in the levels of activation measured at the same average power in  
298 different mice may result from several factors, including the variation in attenuation length and  
299 the level of tissue growth 3 weeks after window implantation. Relating to the temperature  
300 calculation in Figure 3C, the immunohistochemistry results at 150 mW illumination suggest the  
301 upper bound of peak temperature should not exceed 41  $^{\circ}\text{C}$ , which is the peak temperature at an  
302 illumination power of 150 mW, according to our simulation (Figure 3C). Based on this estimated  
303 criterion, the maximum allowable imaging power can be interpolated for different imaging depths  
304 and FOV, according to Figure 3- figure supplement 3 and Figure 3- figure supplement 4. In general,  
305 the maximum brain temperature is lower with larger imaging depth or scanning FOV for the same  
306 excitation power.

307  
308 In addition to 1320 nm, we also simulated brain heating with 1280 nm excitation light since the  
309 water absorption coefficient at 1280 nm is  $\sim 65\%$  of that at 1320 nm (Table 2). As a result, 3PE  
310 with 1280 nm allows almost 50% more average power than 1320 nm with similar EAL (Kobat et al.,  
311 2009), which is potentially beneficial for maximizing imaging depth or FOV. However, the GCaMP6  
312 sensitivity ( $\Delta F/F$ ) with 1280-nm 3PE *in vivo* is only half of that with 1320 nm, which favors 1320 nm  
313 for three-photon calcium imaging (Ouzounov et al., 2019).

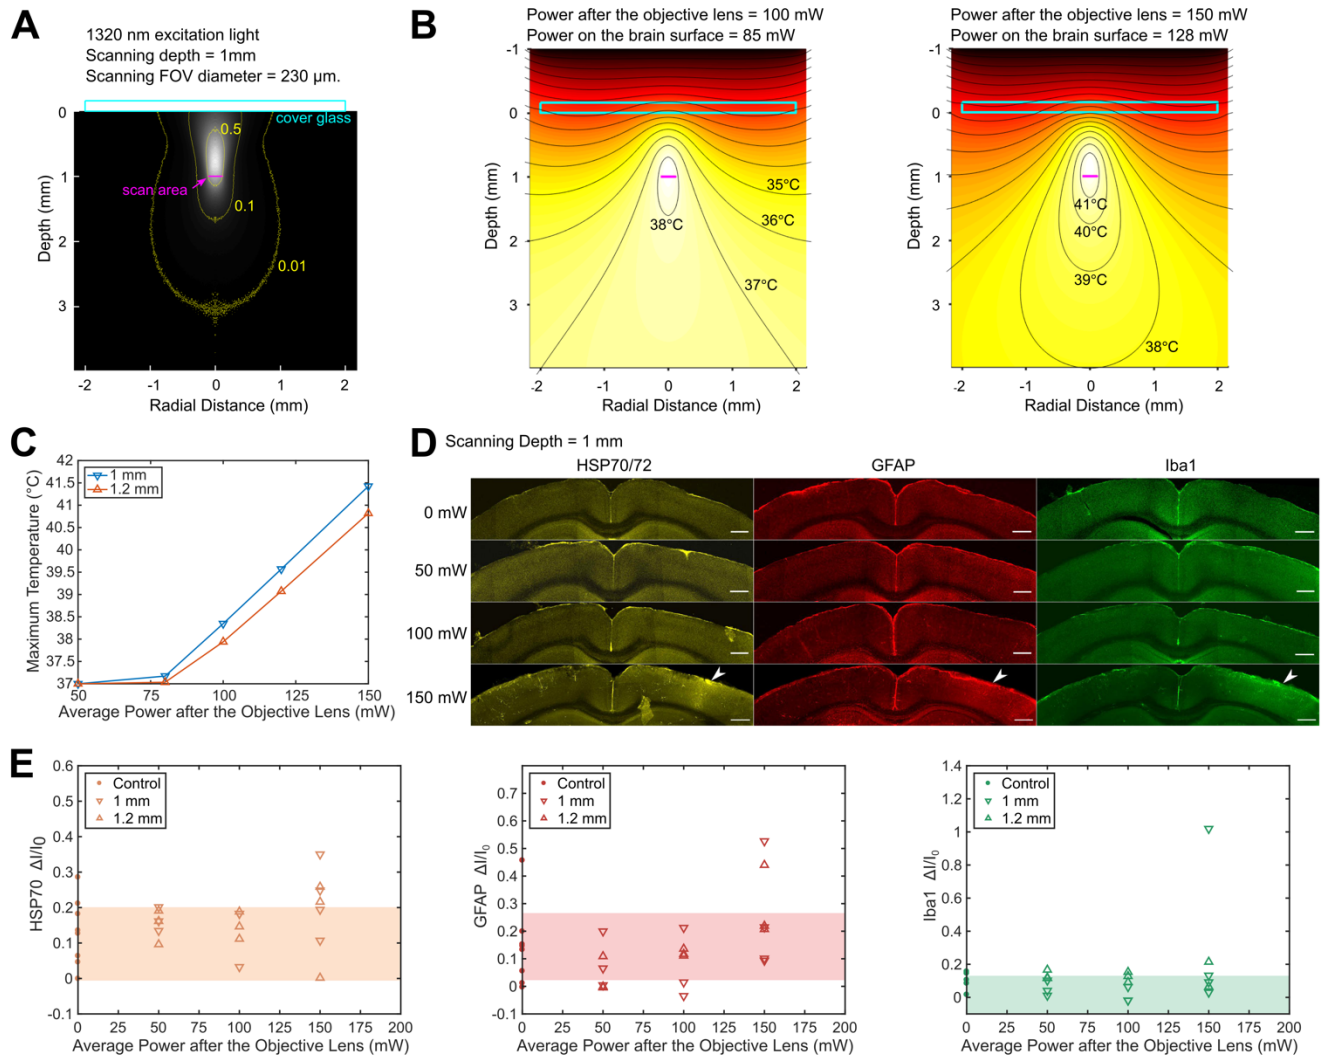

314

315

316

317

318

319

320

321

322

323

Figure 3. Brain heating and thermal damage induced by continuous scanning by 1320-nm 3PM. (A) Monte Carlo simulation of light intensity of 1320-nm excitation light. The excitation light is focused at 1 mm below the brain surface in the cortex by an objective of 1.05 NA at  $\sim$ 75% filling of its back aperture and scanned telecentrically in a 230- $\mu$ m diameter FOV (the horizontal magenta line segment). Three iso-contour lines (from inside to outside) correspond to 0.01, 0.1, and 0.5 of the maximum intensity. (B) Temperature maps under 1320-nm illumination calculated from the power absorption per unit volume in (A) after 60 s of continuous scanning with 100 and 150 mW average power after the objective lens. Temperature is color-coded with isotherms plotted at 1  $^{\circ}$ C increment with the highest 4 temperature levels labeled. The average imaging power is listed at the top of each

324 plot. (C) The maximum temperature versus imaging power for 1 mm and 1.2 mm focal depth, with  
325 other imaging parameters the same as in (A) and (B). The maximum temperature is calculated as the  
326 average in the hottest volume around the scan area ( $\sim 10^7 \mu\text{m}^3$ ). The power at the brain surface can be  
327 obtained by multiplying the power after the 2-mm working distance objective lens with 0.85 for 1 mm  
328 imaging depth, and 0.89 for 1.2 mm imaging depth. (D) Immunolabeled brain slices of mouse brains  
329 after 3PM at 1320 nm with 0, 50 mW, 100 mW, and 150 mW average power (1 mouse is shown for  
330 each power). The brain was scanned for 20 minutes continuously at 1 mm below the surface, with 230  
331  $\mu\text{m} \times 230 \mu\text{m}$  FOV and 2-Hz frame rate. The location of the damage is indicated by the white  
332 arrowheads. Scale bar, 0.5 mm. (E) Quantification of heating-induced damage by the fractional  
333 change of immunolabeling intensity relative to the region in the contralateral hemisphere. Shaded  
334 areas denote 95% confidence interval of the control group mean (n=4 mice for control; n=6 mice for  
335 50 mW; n=5 mice for 100mW; n=7 mice for 150 mW).

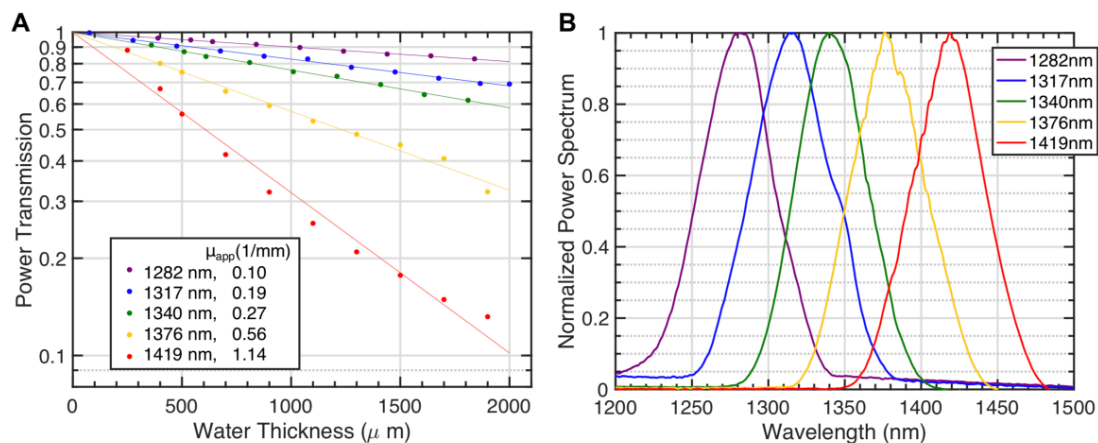

336  
337 Figure 3- figure supplement 1 Light attenuation by immersion water for various excitation  
338 wavelengths.

339 (A) Power transmission versus immersion water thickness under the objective (Olympus  
340 XLPLN25XWMP2, 25X, NA=1.05,  $\sim 75\%$  filling of the back aperture) for 5 spectra centered from 1280

341 nm to 1420 nm using broadband pulses from the NOPA. Each transmission curve is fitted with a single  
 342 exponential function to calculate the apparent attenuation coefficient ( $\mu_{app}$ ). The inset lists these  
 343 coefficients. (B) The spectra of the pulses for the transmission measurement in (A).

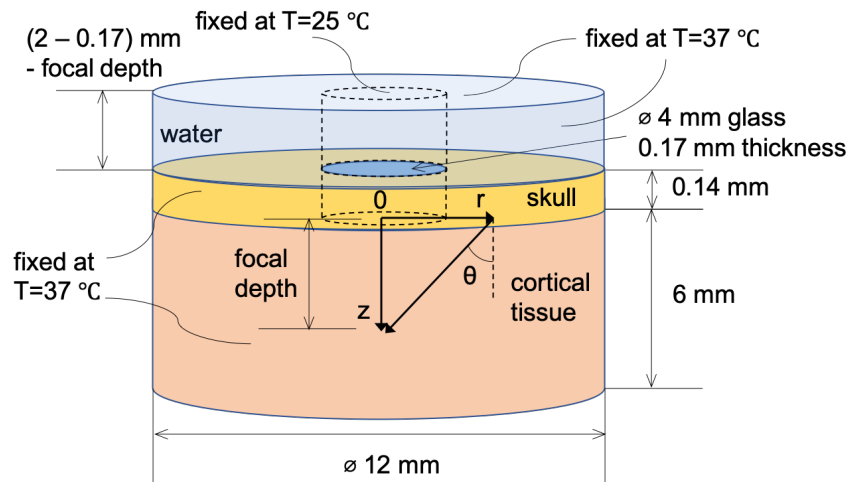

344

345 Figure 3- figure supplement 2. Spatial dimension, coordinate system, and boundary conditions for

346 Monte Carlo and heat conduction simulation.

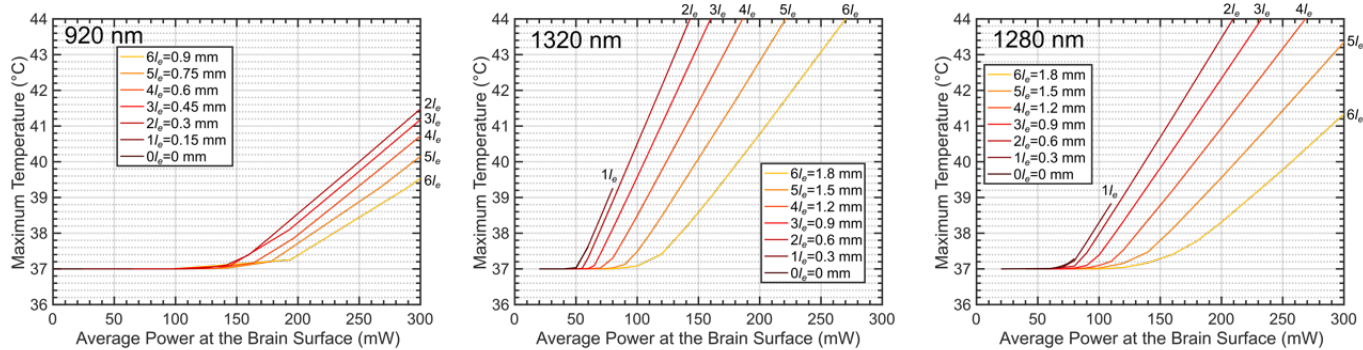

347

348 Figure 3- figure supplement 3. The maximum brain temperature as a function of the average power at

349 the brain surface, shown for different imaging depths at 920 nm, 1320 nm, and 1280 nm.

350 The imaging depth grows in the increment of the nominal effective attenuation length of the cortex

351 ( $l_e$ ), which is 150  $\mu\text{m}$  for 920 nm and 300  $\mu\text{m}$  for both 1320 nm and 1280 nm. The linear scanning FOV

352 diameter is 300  $\mu\text{m}$ , and other parameters used for the simulation are listed in Table 2 and Table 3.

353 For 1320 nm, the power immediately after the objective lens can be calculated by multiplying the

354 power at the brain surface with a factor to correct for immersion water absorption: 1.42, 1.33, 1.27,  
355 1.20, 1.13, 1.07, and 1.01 (from 0 to 6  $l_e$ ). For 1280 nm, the correction factors are: 1.20, 1.17, 1.13,  
356 1.10, 1.07, 1.03, and 1.00 (from 0 to 6  $l_e$ ).

357

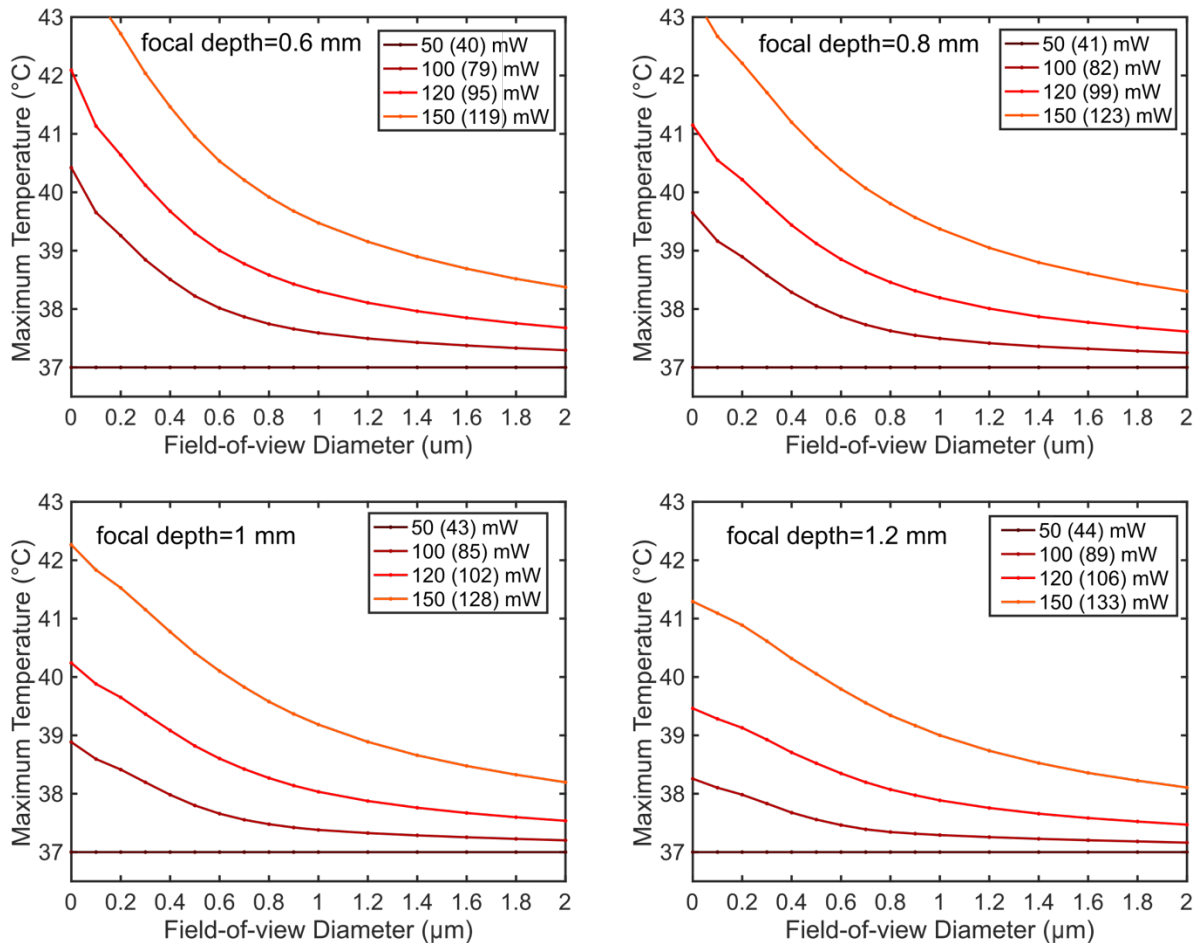

358

359 Figure 3- figure supplement 4. The maximum brain temperature decreases with the scanning field-of-  
360 view.

361 The simulation was performed for 1320-nm excitation wavelength at 1- and 1.2-mm imaging depth  
362 with various average powers after the objective lens. The NA and the back-aperture beam size remain  
363 the same as in Figure 3A. Each legend key indicates the power immediately after the objective lens,



364 followed by the power at the brain surface after immersion water absorption (in the bracket).

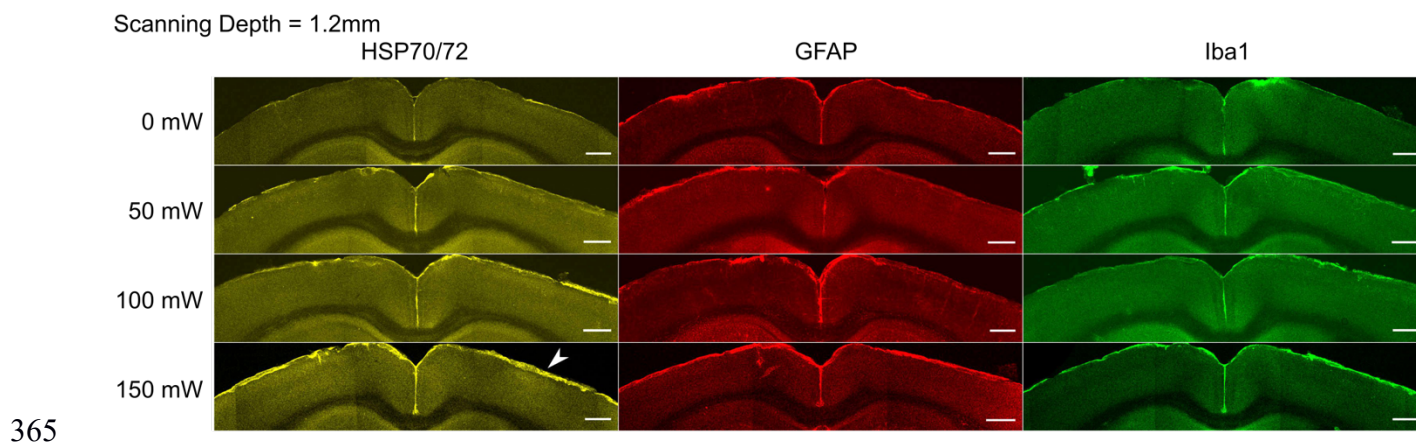

366 Figure 3- figure supplement 5. Immunostaining reveals brain tissue damage by 1320-nm 3PM with  
367 150 mW imaging power after the objective lens at 1.2-mm imaging depth.

368 The scanning was performed with 230  $\mu\text{m}$  FOV for 20 minutes at various average powers in the  
369 mouse brain. The window and scanning area are on the right side of each brain slice, and the location  
370 of heating is indicated with white arrowheads. Scale bar, 500  $\mu\text{m}$ .

**Table 1. Percentage of Excitation Photons for Various Final Destinations.**

|                          | 920 nm | 1320 nm | 1280 nm |
|--------------------------|--------|---------|---------|
| Contributing to heating  | 20     | 63      | 49      |
| Back scattered to window | 25     | 9       | 10      |
| Back scattered to skull  | 20     | 9       | 11      |
| Escaped*                 | 35     | 19      | 30      |

371 \*Photons escape the simulation volume by traveling too far ( $>6$  mm) from the center of the cranial  
372 window or too deep ( $>6$  mm) from the tissue surface.

373

374 High peak excitation intensity has several adverse effects on brain imaging, including fluorophore  
375 saturation, bleaching, and nonlinear tissue damage. For GCaMP6s, we calculated that  
376 fluorescence saturation (i.e., ground-state depletion) occurs at 4-5 nJ under 3PE under our  
377 imaging conditions (Materials and Methods). Laser-induced nonlinear damage can be observed in

378 cells as a sudden but irreversible elevation to extraordinary brightness, which is caused by the  
379 rapid ionization and recombination of molecules followed by pressure increase (Tsai et al., 2009).  
380 In general, the damage threshold for the peak intensity increases with wavelength (Fu et al., 2006;  
381 König et al., 1999; Olivié et al., 2008). Since the area of the focal spot scales as  $\lambda^2$ , where  $\lambda$  is the  
382 excitation wavelength, the long wavelength used for 3PM allows higher pulse energy than 2PM.  
383 Our previous work showed that neurons remain healthy and viable for weeks after hours of  
384 exposure to 1.5 nJ pulses (60 fs and NA~0.75) at the 1300-nm wavelength (Ouzounov et al., 2017).  
385 As an estimate of the upper bound of pulse energy, we observed that ~10 nJ at the focus causes  
386 tissue ablation, in agreement with another independent study (Yildirim et al., 2019). In addition, it  
387 was shown that 1 to 2 nJ pulse energy at the focus (~ 40 fs, NA ~ 1.0) does not appear to alter the  
388 physiological response of the neurons under visual stimulation (Yildirim et al., 2019). Based on  
389 these results, 1 to 2 nJ pulse energy at the focus is reasonable for 3PM to achieve sufficient signal  
390 strength while avoiding nonlinear photodamage and fluorophore saturation.

391

## 392 Discussion

393 In this study, we quantitatively compared 1320-nm 3PM and 920-nm 2PM for deep tissue  
394 GCaMP6 imaging. The 1320-nm 3PM has the benefit of more efficient signal generation and  
395 substantially higher SBR for calcium imaging in the deep mouse brain cortex. We find that 1320  
396 nm 3PM outperforms 2PM in signal generation efficiency at a depth beyond ~ 700  $\mu\text{m}$  in mouse  
397 neocortex regardless of the labeling density. In the densely labeled mouse brain, e.g., CaMKII  
398 GCaMP6s transgenic mouse, 1320-nm 3PM is preferred beyond the depth where SBR ~ 1 (e.g., ~4  
399 EALs or 600  $\mu\text{m}$  in mice neocortex). In practice, depending on the labeling density and expression

400 nonuniformity, 3PM might be considered at an even shallower depth to prevent recording bias  
401 against neurons with lower expression levels, e.g., ~3 EALs or ~450  $\mu\text{m}$  (Figure 3D).

402

403 Based on our results, it is clear that the laser repetition rate should be optimized at different  
404 depths to maximize the FOV or the number of neurons recorded. In the shallow region of the  
405 brain, the repetition rate should be high for strong signal generation, with the pulse energy kept  
406 low to avoid nonlinear damage. For deeper imaging in the brain, where the thermal damage by  
407 average power becomes predominant, the repetition rate should be reduced while keeping the  
408 average power constant, since the 3PE signal is proportional to  $P^3/f^2\tau^2$ . For example, when  
409 imaging GCaMP6s-labeled at 600  $\mu\text{m}$  depth using 1320 nm 3PE, ~15 nJ pulse energy on the brain  
410 surface is required for 0.1 photons/pulse detected (Figure 1B), and the maximum repetition rate  
411 to avoid substantial tissue temperature rise is  $100\text{mW}/15\text{nJ} = 6.7\text{ MHz}$ , where 100 mW is  
412 predicted as a safe power to avoid thermal damage at this imaging depth, given a large enough  
413 scanning FOV (Figure 3- figure supplement 3 and Figure 3- figure supplement 4). When imaging  
414 the hippocampus at ~ 1 mm depth, the maximum repetition rate has to be reduced to 120  
415 mW/100 nJ = 1.2 MHz, since the pulse energy delivered to the brain surface has to increase  
416 exponentially with depth and the white matter has a much smaller attenuation length than the  
417 grey matter (Horton et al., 2013; M. Wang et al., 2018).



## 418 **Materials and Methods**

### 419 **Simultaneous 1320-nm 3PM and 920-nm 2PM Imaging with Time Division Multiplex Scheme**

420 The excitation source for 1320-nm 3PM was a noncollinear optical parametric amplifier (NOPA,  
421 Spectra-Physics) pumped by an ultrafast amplifier (Spirit, Spectra-Physics). The excitation source  
422 for 920-nm 2PM was a mode-locked Ti:Sapphire laser (Tsunami, Spectra-Physics). The two  
423 excitation beams were launched into a custom-built microscope, described in our previous works  
424 (Ouzounov et al., 2019, 2017). The 3PE wavelength was centered at 1320 nm and 2PE at 920 nm  
425 for the optimal  $d'$  (Ouzounov et al., 2019). The two excitation beams were verified to have similar  
426 spatial resolution well below the size of neurons or blood vessels such that their excitation  
427 volumes are almost identical (Ouzounov et al., 2019).

428  
429 Time-division multiplex (TDM) achieves nearly simultaneous 2PM and 3PM imaging by alternating  
430 between spatially overlapped 920-nm and 1320-nm laser beams on a microsecond time scale. 2PE  
431 and 3PE fluorescence signals were separated according to the recorded laser clock. More details  
432 about the setup can be found in (Ouzounov et al., 2017). The calcium activities were recorded  
433 with a 13.6 Hz frame rate. The excitation power for 3PM and 2PM were adjusted to yield similar  
434 photon count per frame to yield about the same noise level, and the FOV was reduced to increase  
435 the laser dwell time on neuron bodies.

436

### 437 **Photon Counting Schemes**

438 The microscope was first tested for shot-noise limited performance by photon counting the signal  
439 generated by stationary 1320-nm or 920-nm beam focused in fluorescein solution ( $\sim 40 \mu\text{M}$  and  
440  $\text{pH}=10$ ). The laser power was chosen ( $\sim 0.3 \text{ mW}$  for both wavelengths) to ensure the photon

441 counts per second is lower than 5% of the laser repetition rate of the NOPA, which limits the  
442 photon stacking error to within 2.5% of the total counts. According to Poisson statistics, photon  
443 stacking error causes a fraction of  $1 - (1 - e^{-\lambda})/\lambda$  underestimation in photon counts, where  $\lambda$  is  
444 the average count per second divided by the laser repetition rate. For Ti:Sapphire, the photon  
445 stacking error is negligible since the typical photon counts are below 1% of its repetition rate  
446 (80MHz). In this experiment, the PMT (Hamamatsu H7422-40) anode current was first amplified  
447 with a 10MHz bandwidth pre-amplifier (C9999, Hamamatsu), and then counted by a photon  
448 counter (SR400, Stanford Research). Shot-noise limited performance was confirmed for our  
449 imaging system.

450

451 During imaging, the photon counts of neurons were obtained by converting pixel values to photon  
452 counts according to a conversion factor. The calibration was done by parking a 920-nm or 1320-  
453 nm focus in a fluorescein sample and then perform photon counting and imaging consecutively.  
454 Linearity between pixel values and photon counts were tested by changing the laser power, and  
455 the ratio between them was used as the conversion factor. In fact, recording analog value is a  
456 better way to measure high photon counts, since there is no photon stacking error and the  
457 voltage signal can simply be summed. The conversion factor was further confirmed by observing  
458 the first mode in a pixel value histogram. The zeroth mode of a pixel histogram peaks at PMT  
459 offset value, and the first mode is larger than that, representing pixels receiving exactly one  
460 photon. Higher-order modes can also be observed, representing pixels receiving multiple photons.  
461 For all simultaneous 2P and 3P imaging, the sampling frequency was 5 MHz, so that direct photon  
462 counting based on images could also be performed, which showed consistent results in  
463 comparison to analog recordings.

464 **Measurement of Excitation light Attenuation in the Brain Tissue Based on Fluorescence Signal**

465 The vasculature imaging was performed simultaneously with 2PM and 3PM using the TDM  
466 scheme. The image stack was taken with 10  $\mu\text{m}$  step size in depth, and the imaging power was  
467 increased with imaging depth to keep the signal level approximately constant. The signal of each  
468 frame was calculated as the average of the brightest 0.5% pixel values and then converted to  
469 photon counts per excitation pulse according to the method described in the previous section.  
470 The fraction of excitation power reaching the focus from the brain surface (Focus Power/Surface  
471 Power) was calculated as the square (cubic) root of the ratio of the 2PE (3PE) signal at the imaging  
472 depth and at the brain surface.

473

474 **Measurement of the Pulse Energy Required per 0.1 Photon Detection**

475 To have a fair comparison on the excitation efficiency of 920-nm 2PM and 1320-nm 3PM, we  
476 controlled all the parameters regarding 2PE and except for the wavelength. For both wavelengths,  
477 the axial resolution was made equal by adjusting the beam size at the back aperture of the  
478 objective separately. The point spread functions of both wavelengths were also overlapped  
479 laterally (by fine-tuning the 920-nm beam pointing direction) and axially (by changing the field  
480 curvature of the 920-nm beam at the objective lens back aperture by slight adjustment of the  
481 distance between the lenses of a 1:1 telescope). For both wavelengths, the pulse durations were  
482 scaled to 60 fs (measured pulse durations were 60-70 fs in FWHM for 1320-nm, and 180-200 fs for  
483 920-nm. All pulses were assumed to have  $\text{sech}^2$  profile). Light absorption by the immersion water  
484 was taken into account when calculating the pulse energy for 1320 nm on the brain surface. As we  
485 show in Figure 3- figure supplement 1, it is important to distinguish the pulse energy on the brain  
486 surface and after the objective lens for 1320 nm excitation.

487 Based on the fluorescence signals derived from simultaneous 2P and 3P imaging, Figure 1B was  
488 plotted using the following equations (Xu and Webb, 1997):

$$S_{2P}/f = C_2(P/f)^2/\tau \quad (3)$$

$$S_{3P}/f = C_3(P/f)^3/\tau^2 \quad (4)$$

489  
490 where  $S_{nP}/f$  is the n-photon-excited signal yield in the unit of detected photons/pulse,  $P$  is the  
491 average power at the brain surface,  $f$  is the repetition rate,  $\tau$  is the pulse duration, and  $C_n$  ( $n=2$   
492 and 3) are the coefficients to be determined. For vasculature imaging,  $S_{nP}/f$  is calculated as the  
493 average of the brightest 0.5% pixel values per frame, converted to photon counts. For GCaMP6s-  
494 labeled neurons,  $S_{nP}/f$  was calculated from the sum of time-averaged pixel values in cell bodies  
495 (averaging time = 75 s, on 37 different cells in 5 animals). Given that  $P/f$  and  $\tau$  are already  
496 measured during the experiment,  $C_n$  can be solved. To produce Figure 1B, we plugged  $C_n$  into the  
497 equations and set the signal yield (i.e.,  $S_{nP}/f$ ) to 0.1 photons per pulse, pulse duration to 60 fs,  
498 and then solve for pulse energy  $P/f$  on the sample surface according to Equations 2 and 3.  
499 To account for the EAL variation recorded from different animals in Figure 1B, we measured the  
500 effective attenuation length (EAL) of the cortical layers of each animal by imaging fluorescein-  
501 labeled blood vessels immediately after calcium imaging. The depths of neurons were rescaled by  
502 dividing the measured EAL and then multiplying with the nominal EAL (i.e., 293  $\mu\text{m}$  for 1320 nm  
503 3PE and 154  $\mu\text{m}$  for 920 nm, as measured by the vasculature data). The logarithm of the neuron  
504 signal was plotted against depth, and then fitted with a linear model for the slope and intercept  
505 (Figure 1B). The slope equals  $\ln(10)/\text{EAL}$ , and the intercept equals to the pulse energy required  
506 to yield 0.1 detected photon per pulse on the sample surface (i.e., zero imaging depth).

507

## 508 **Measurement of Signal-to-background Ratio**

509 The signal of each frame was measured as the average of the brightest 0.1% pixel values. For  
510 vasculature data, the background was measured as the average pixel values of regions  
511 surrounding the blood vessels (i.e., not labeled). For GCaMP6 neural data, the background was  
512 measured as the pixel value in the shadow of big blood vessels. The pixel values of cortical tissue  
513 surrounding the neurons cannot be used as background since it contains densely labeled neuronal  
514 processes except for area within the blood vessels. SBR was calculated as the signal divided by the  
515 background.

## 516 **Quantification of Vasculature Volume Fraction and Staining Inhomogeneity**

517 The SBR limit of 2PM depends on the spatial inhomogeneity of staining (Theer and Denk, 2006).  
518 We quantified the staining inhomogeneity of fluorescein-labeled vasculature in order to compare  
519 the *in vivo* SBR measurement to the theory and *ex vivo* fluorescent beads measurement (Theer  
520 and Denk, 2006). The volume fraction of the vasculature can be estimated by the fraction of the  
521 stained blood vessel area in each xy image frame. Figure 2-figure supplement 1 shows the  
522 fractional vascular area vs. imaging depth, derived from the same 3PM dataset, as in Figure 2B.  
523 The segmentation of blood vessel regions was performed with *graythresh* function in MATLAB and  
524 then inspected manually for correctness. We concluded that the labeled vascular volume accounts  
525 for  $2 \pm 1\%$  (mean  $\pm$  standard deviation) in the imaged column of the mouse cortex ( $\sim$ 2mm lateral  
526 and 2mm caudal to the Bregma point, Figure 2B). Our result is in close agreement with other  
527 studies quantifying the fractional vascular volume by imaging sliced brains *ex vivo* ( $\sim$ 2% for blood  
528 vessels of 20  $\mu$ m or less diameter in the primary somatosensory cortex) (Wang et al., 2019; Xiong  
529 et al., 2017). We noticed that most of the blood vessels in the imaged volume has a diameter of  
530 less than 20  $\mu$ m, except for a few on the brain surface (Figure 2-figure supplement 1A). The blood

531 vessel density is lower in the white matter (~750-850  $\mu\text{m}$ ) than that in the cortex (Figure 2-figure  
532 supplement 1B). The staining inhomogeneity is defined as  $\chi = \hat{C}/\langle C \rangle$ , where  $C = C(x, y, z)$   
533 denotes the spatial distribution of dye concentration in the entire imaged volume,  $\hat{C}$  is the  
534 maximum concentration, and  $\langle C \rangle$  is the average concentration (Theer and Denk, 2006). Staining  
535 inhomogeneity can be estimated as  $1/(\text{fractional vascular volume})$  with the assumption that all the  
536 labeled blood vessels are equally bright ( $C=1$  for all vasculature), and the rest of tissue is  
537 completely unstained ( $C=0$  for the rest). Our experiments show that 2PM reaches SBR of 1 at  
538 about  $4.7 l_e$ , i.e., 730  $\mu\text{m}$  with  $l_e = 154 \mu\text{m}$  (Figure 2B). This result is in close agreement to the  $4.7 l_e$   
539 predicted by theoretical calculation with a staining inhomogeneity of 50 (Theer and Denk, 2006).

540

#### 541 **Analysis of the Calcium Traces of Neurons**

542 Sample motion in the original images, if any, was corrected by TurboReg plug-in in ImageJ.  
543 Regions of interest (ROIs) were generated by manual segmentation of neuron bodies. The pixel  
544 values of ROIs were exported to MATLAB 2016b for further processing. All the pixels in the ROI  
545 were summed and converted to photon counts. Spikes were inferred by thresholding the Poisson-  
546 distribution-based likelihood function derived from each trace (Wilt et al., 2013). The  
547 discrimination threshold was chosen to be  $C = \ln((1-r)/r)$ , where  $r$  is the estimated firing rate, which  
548 was estimated for each individual trace as the fraction of the trace that is more than 1.5 standard  
549 deviation above its mean. The baseline ( $F_0$ ) was determined by averaging trace values, after  
550 excluding the spikes and their rising and falling edges. For the processed traces in Figure 1C,  
551 fluorescence intensity traces were low-pass filtered with a hamming window of a time constant of  
552 0.37 s. Traces ( $F$ ) were normalized according to the equation  $(F - F_0)/F_0$ .

553

## 554 **Measurement of $\Delta F/F$ ratio from Simultaneously Recorded 3PM and 2PM Calcium Traces**

555 Based on the low-pass-filtered and normalized calcium traces described in the section above, the  
556 peaks of spikes were detected by finding local maxima that are larger than 30%  $\Delta F/F$  in 3PM traces  
557 and have corresponding spike peaks detectable in 2PM traces. To produce the plot of Figure 2D,  
558 the ratios of 2PM and 3PM  $\Delta F/F$ , i.e.,  $(\Delta F/F)_{2P}/(\Delta F/F)_{3P}$ , of the same calcium transients were taken,  
559 and the depth of each neuron was normalized with the EAL of each animal.

560

## 561 **Monte Carlo Simulation of Light Propagation and Validation of Tissue Optical Parameters**

562 We used Monte Carlo simulation to calculate light propagation in the brain tissue, following the  
563 algorithm described previously (Stujenske et al., 2015). Podgorski *et al.* adapted the same  
564 numerical recipe to predict tissue temperature change during two-photon imaging, which agreed  
565 well with experimental measurements at the wavelengths of 800 nm, 920 nm, and 1064 nm  
566 (Podgorski and Ranganathan, 2016). In order to simulate for 1320 nm and 1280 nm excitation, we  
567 measured and estimated brain optical parameters as follows: For excitation wavelength longer  
568 than 1200 nm, water accounts for the majority of the light absorption in brain tissue *in vivo*  
569 (Jacques, 2013). Therefore, tissue absorption coefficients  $\mu_a$  was approximated with 75% of the  
570 spectrum-weighted water absorption coefficient (defined in Section Measurement of Optical  
571 Absorption by Immersion Water), and the 75% is based on the water content of brain tissue  
572 (Jacques, 2013; Tschöp et al., 2013). Tissue scattering coefficients  $\mu_s$  were then calculated from  
573 our measured effective attenuation lengths according to  $l_e = 1/(\mu_a + \mu_s)$ , with  $l_e = 150 \mu\text{m}$  at 920 nm,  
574 and  $300 \mu\text{m}$  at 1320 nm and 1280 nm. As cross-validation, the calculated scattering coefficient at  
575 1320 nm is close to that measured by Gebhart *et al.* (i.e.,  $3.0 \text{ mm}^{-1}$ ) (Gebhart et al., 2006). We  
576 assumed an anisotropy factor  $g = 0.9$  and tissue refractive index  $n = 1.36$  for 920 nm, 1280 nm,

577 and 1320 nm, since their variation in the wavelength range of interest is negligible. All the tissue  
578 optical parameters are summarized in Table 2.

**Table 2. Optical Parameters of Grey Matter.**

| Variable | Parameter              | Wavelength | Value | Units         |
|----------|------------------------|------------|-------|---------------|
| $\mu_a$  | absorption coefficient | 920        | 0.039 | 1/mm          |
|          |                        | 1280       | 0.078 | 1/mm          |
|          |                        | 1320       | 0.12  | 1/mm          |
| $\mu_s$  | scattering coefficient | 920        | 6.7   | 1/mm          |
|          |                        | 1280       | 3.2   | 1/mm          |
|          |                        | 1320       | 3.2   | 1/mm          |
| $g$      | anisotropy coefficient | All        | 0.9   | dimensionless |
| $n$      | refractive index       | All        | 1.36  | dimensionless |

579

580 To simulate underfilling of the objective back aperture, we initialized random photon distribution  
581 incident to the brain surface according to the relations:

$$\begin{aligned}w &= w_0 \sqrt{-1/2 \ln(X)} \\ \theta &= \sin^{-1}(w/n_0 f) \\ r &= \tan(\theta) z\end{aligned}\tag{5}$$

582

583 where  $X$  is a random variable drawn from a uniform distribution from 0 to 1,  $w_0$  is the  $1/e^2$  beam  
584 radius of the Gaussian beam at the objective back aperture,  $w$  is the radial distance to the  
585 objective optical axis of a randomly generated photon conforming to the Gaussian beam profile  
586 mentioned above,  $f$  is the objective focal length,  $n_0$  is the refractive index of immersion water,  $z$  is  
587 the imaging depth in the sample.  $r$  and  $\theta$  define, respectively, the radial coordinate of photon  
588 position and the polar angle of propagation direction, both with respect to the objective optical  
589 axis (Figure 3- figure supplement 2). The objective (Olympus XLPLN25XWMP2, 25X, NA=1.05, f=7.2  
590 mm) is under-filled, with 70% of its back aperture matched to the  $1/e^2$  beam diameter of a



591 Gaussian beam, which gives an effective NA of  $\sim 0.75$  (Theer and Denk, 2006). The geometry of  
 592 the simulation volume and boundary conditions are shown in Figure 3- figure supplement 2.

593

### 594 Heat Diffusion Model with Bio-heat Equation

595 Using the light intensity as the heat source, we calculated the temperature distribution by solving  
 596 numerically the bio-heat equation (6), identical to that used previously by Stujenske *et al.*

597 (Stujenske *et al.*, 2015):

$$\rho c \frac{\partial T(\vec{r}, t)}{\partial t} = k \nabla^2 T(\vec{r}, t) + \rho_b c_b w_b (T_A - T(\vec{r}, t)) + S_h(\vec{r}) + q_m \quad (6)$$

598 where  $T(\vec{r}, t)$  is the spatial-temporal temperature distribution,  $S_h(\vec{r})$  is the radiative heat  
 599 generation from Monto Carlo simulation, and the rest of the parameters and their values are  
 600 listed in Table 3, which are the same as in ref. (Stujenske *et al.*, 2015).

**Table 3. Thermal and Mechanical Properties of Grey Matter (Stujenske *et al.*, 2015).**

| Variable | Parameter            | Value                 | Units                          |
|----------|----------------------|-----------------------|--------------------------------|
| $\rho$   | density              | $1.04 \times 10^{-3}$ | $\text{g/mm}^3$                |
| $c$      | Brain specific heat  | $3.65 \times 10^3$    | $\text{mJ/g}^\circ\text{C}$    |
| $k$      | Thermal conductivity | 0.527                 | $\text{mW/mm } ^\circ\text{C}$ |
| $\rho_b$ | Blood density        | $1.06 \times 10^{-3}$ | $\text{g/mm}^3$                |
| $c_b$    | Blood specific heat  | $3.6 \times 10^3$     | $\text{mJ/g}^\circ\text{C}$    |
| $w_b$    | Blood perfusion rate | $8.5 \times 10^{-3}$  | /s                             |
| $q$      | Metabolic heat       | $9.5 \times 10^{-3}$  | $\text{mW/mm}^3$               |
| $T_A$    | Arterial temperature | 36.7                  | $^\circ\text{C}$               |

601

602 We calculated steady-state temperature distribution at various imaging depths (0-6 attenuation  
 603 lengths) and average powers for 920 nm, 1320 nm, and 1280 nm. Figure 3- figure supplement 3  
 604 shows the maximum tissue temperature as a function of the average input power on the brain

605 surface. The maximum temperature is evaluated as the average temperature in a volume of  $\sim 10^7$   
606  $\mu\text{m}^3$  (Figure 3- figure supplement 3), or equivalent to a cylinder of  $\sim 120\text{-}\mu\text{m}$  radius and  $\sim 210\text{-}\mu\text{m}$   
607 height enclosing the hottest region of the tissue. The power at the brain surface is calculated from  
608 the power immediately after the objective lens by taking account of the absorption by immersion  
609 water.

610

### 611 **Immunohistology for Assessing Thermal Damage Induced by 1320nm Illumination**

612 The experiment was performed 3 weeks after the window implantation. Anesthetized (2%  
613 isoflurane mixed with oxygen) mice were exposed to continuous scanning for 20 min at a 2-Hz  
614 frame rate and  $230\ \mu\text{m} \times 230\ \mu\text{m}$  FOV, similar to 3PM of neural activity at 1320-nm. After 18  
615 hours, mice were perfused with 4% paraformaldehyde, and post fixed in the same solution for 24  
616 hours, followed by sucrose solutions immersion (10%, 20%, and 30% incrementally). Scanned  
617 brain regions were coronally sectioned into  $200\ \mu\text{m}$  sections and blocked at room temperature.  
618 Alternating slices were incubated at  $4\ ^\circ\text{C}$  overnight, with primary antibodies for heat shock protein  
619 (HSP70/72), glial fibrillary acidic protein (GFAP), and Iba1. Primary antibodies used were mouse  
620 monoclonal anti-HSP70/72 (C92F3A-5) (ADI-SPA-810-F, Enzo, 1: 400 dilution), mouse anti-GFAP  
621 (G3893, Sigma-Aldrich, 1:760 dilution), and mouse anti-Iba1 (SAB2702364, Sigma-Aldrich, 1:  
622 1000). Slices were washed and incubated with secondary antibody conjugated to Alexa Fluor 546  
623 (A11003, ThermoFisher, 1:500 dilution) at  $4\ ^\circ\text{C}$  overnight, washed again, and mounted in  
624 VECTASHIELD antifade medium for confocal imaging. Images were analyzed with ImageJ. The  
625 intensity ( $I_0$ ) was determined by the average intensity in the region of interest  $\sim 1\ \text{mm}$  wide  
626 centered around the illuminated site covering the entire thickness of the neocortex, and the  
627 baseline ( $I_0$ ) was determined in the mirror position in the contralateral hemisphere. The level of

628 tissue response was quantified as the fractional change of immunolabeling intensity relative to the  
629 region of contralateral hemisphere:  $(I - I_0)/I_0$ . The procedures described here follows closely the  
630 previous studies on assessing thermal damage caused by 2-photon imaging of mouse brain  
631 (Podgorski and Ranganathan, 2016).

### 632 **Calculation of the Pulse Energy for Fluorophore Saturation under Three-photon Excitation**

633 At high excitation intensity, the excitation probability per pulse per fluorophore can be so high  
634 that some fluorophores will not decay to the ground state before the arrival of the next excitation  
635 pulse (Xu and Webb, 1997). The excitation probability per pulse for a fluorescent molecule at the  
636 center of the focus is calculated as (Xu and Webb, 1997):

$$Pr = 1 - \exp \left[ -\frac{g_p^{(3)}}{\tau^2} \sigma_3 \left( \frac{NA^2 \pi}{\lambda_{3P}^2} \right)^3 \left( \frac{P_{3P}}{f} \right)^3 \right] \quad (7)$$

637 Where the definition and values of all the parameters remain the same as in the previous section.

638 Using GCaMP6s 3PE cross section of  $3 \times 10^{-82} \text{ cm}^6 \text{ s}^2$ , the pulse energy (i.e.,  $\frac{P_{3P}}{f} \cdot \frac{hc}{\lambda_{3P}}$ ) required for  
639 10% and 63% excitation probability per pulse is 2 nJ and 4.3 nJ, respectively. We note that these  
640 pulse energies are much smaller (by  $\sim 2\pi$ ) than those given by Yildirim *et al.* (Yildirim et al., 2019).  
641 This factor of  $2\pi$  error in ref. (Yildirim et al., 2019) is probably due to a typo (the Planck's constant  
642  $h$  and  $\hbar$ ) since the correct equation for 2PE saturation intensity was given by the same authors in  
643 earlier work (So et al., 2000).

644

### 645 **Animal Procedures**

646 Chronic craniotomy was performed on mice according to the procedures described in (Ouzounov  
647 et al., 2017). Windows of 5-mm diameter were centered at  $\sim 2.5$  mm lateral and  $\sim 2$  mm caudal

648 from the bregma point over the somatosensory cortex. Vasculature imaging was performed on  
649 wild-type mice (8-15 weeks, male, C57BL/6J, The Jackson Laboratory) with retro-orbital injection  
650 of fluorescein dextran conjugate (10 kDa, 25 mg dissolved in 200  $\mu$ l saline). Calcium imaging was  
651 performed on five different transgenic animals with GCaMP6s-labeled neurons (3 males and 2  
652 females, 11-17 weeks, CamKII-tTA/tetO-GCaMP6s). The spontaneous calcium activity imaging was  
653 performed on awake or lightly anesthetized (0.5-1% isoflurane mixed with oxygen) animals.  
654 Thermal damage experiments were performed on wild-type mice (3 to 4 mice for each depth and  
655 power combination, for a total of 23 mice, 8-30 weeks, male, C57BL/6J, The Jackson Laboratory).  
656 All animal experimentation and housing procedures were conducted in accordance with Cornell  
657 University Institutional Animal Care and Use Committee guidance.

658

### 659 **Acknowledgments**

660 We thank Dr. Kaspar Podgorski for sharing the code for brain heating simulation and the protocol  
661 for immunohistochemistry. We also thank Dr. Peter So for the discussion on three-photon  
662 excitation saturation. This work has been supported by National Science Foundation (DBI-  
663 1707312, Neuronex Hub), Intelligence Advanced Research Projects Activity (D16PC00003),  
664 National Institutes of Health (DP2MH109982), and Cornell Neurotech Mong Fellowships.

665

### 666 **Competing interests**

667 The authors declare no conflict of interests.

668 **References**

- 669
- 670 Attardo A, Fitzgerald JE, Schnitzer MJ. 2015. Impermanence of dendritic spines in live adult CA1  
671 hippocampus. *Nature* **523**:592–596. doi:10.1038/nature14467
- 672 Chen Bi, Huang X, Gou D, Zeng J, Chen G, Pang M, Hu Y, Zhao Z, Zhang Y, Zhou Z, Wu H, Cheng H,  
673 Zhang Z, Xu C, Li Y, Chen L, Wang A. 2018. Rapid volumetric imaging with Bessel-Beam three-  
674 photon microscopy. *Biomed Opt Express* **9**:3427–3433.
- 675 Chen T-W, Wardill TJ, Sun Y, Pulver SR, Renninger SL, Baohan A, Schreiter ER, Kerr R a, Orger MB,  
676 Jayaraman V, Looger LL, Svoboda K, Kim DS. 2013. Ultrasensitive fluorescent proteins for imaging  
677 neuronal activity. *Nature* **499**:295–300. doi:10.1038/nature12354
- 678 Cheng L-C, Horton NG, Wang K, Chen S-J, Xu C. 2014. Measurements of multiphoton action cross  
679 sections for multiphoton microscopy. *Biomed Opt Express* **5**:3427–33. doi:10.1364/BOE.5.003427
- 680 Dana H, Mohar B, Sun Y, Narayan S, Gordus A, Hasseman JP, Tsegaye G, Holt GT, Hu A, Walpita D,  
681 Patel R, Macklin JJ, Bargmann CI, Ahrens MB, Schreiter ER, Jayaraman V, Looger LL, Svoboda K,  
682 Kim DS. 2016. Sensitive red protein calcium indicators for imaging neural activity. *Elife* **5**:1–24.  
683 doi:10.7554/eLife.12727
- 684 Dana H, Sun Y, Mohar B, Hulse BK, Kerlin AM, Hasseman JP, Tsegaye G, Tsang A, Wong A, Patel R,  
685 Macklin JJ, Chen Y, Konnerth A, Jayaraman V, Looger LL, Schreiter ER, Svoboda K, Kim DS. 2019.  
686 High-performance calcium sensors for imaging activity in neuronal populations and  
687 microcompartments. *Nat Methods* **16**:649–657. doi:10.1038/s41592-019-0435-6
- 688 Dombeck D a, Harvey CD, Tian L, Looger LL, Tank DW. 2010. Functional imaging of hippocampal place  
689 cells at cellular resolution during virtual navigation. *Nat Neurosci* **13**:1433–40.  
690 doi:10.1038/nn.2648
- 691 Escobet-Montalbán A, Gasparoli M. F, Nylk J, Liu P, Yang Z, Dholakia K. 2018. Three-photon light-sheet  
692 fluorescence microscopy. *Opt Lett* **43**:5484–5487.
- 693 Fu Y, Wang H, Shi R, Cheng J. 2006. Characterization of photodamage in coherent anti-Stokes Raman  
694 scattering microscopy. *Opt Express* **14**:3942–3951.
- 695 Gebhart SC, Lin WC, Mahadevan-Jansen A. 2006. In vitro determination of normal and neoplastic  
696 human brain tissue optical properties using inverse adding-doubling. *Phys Med Biol* **51**:2011–  
697 2027. doi:10.1088/0031-9155/51/8/004
- 698 Horton N, Wang K, Kobat D, Wise FW, Xu C. 2013. In Vivo Deep Penetration Three-Photon Imaging of  
699 Mouse Brain through an Unthinned, Intact SkullOptics in the Life Sciences. Optical Society of  
700 America. p. NT3B.3. doi:10.1364/NTM.2013.NT3B.3
- 701 Inoue M, Takeuchi A, Manita S, Horigane S, Sakamoto M, Kawakami R, Yamaguchi K, Otomo K,  
702 Yokoyama H, Kim R, Yokoyama T, Takemoto-Kimura S, Abe M, Okamura M, Kondo Y, Quirin S,  
703 Ramakrishnan C, Imamura T, Sakimura K, Nemoto T, Kano M, Fujii H, Deisseroth K, Kitamura K,  
704 Bito H. 2019. Rational Engineering of XCaMPs, a Multicolor GECI Suite for In Vivo Imaging of  
705 Complex Brain Circuit Dynamics. *Cell* **177**:1–15. doi:10.1016/j.cell.2019.04.007
- 706 Jacques SL. 2013. Optical Properties of Biological Tissues: A Review. *Phys Med Biol* **58**:R37-61.  
707 doi:10.1088/0031-9155/58/11/R37
- 708 Kobat D, Durst ME, Nishimura N, Wong AW, Schaffer CB, Xu C. 2009. Deep tissue multiphoton  
709 microscopy using longer wavelength excitation. *Opt Express* **17**:13354–64.
- 710 Kobat D, Horton NG, Xu C. 2011. In vivo two-photon microscopy to 1.6-mm depth in mouse cortex. *J*  
711 *Biomed Opt* **16**:106014. doi:10.1117/1.3646209
- 712 Kondo M, Kobayashi K, Ohkura M, Nakai J, Matsuzaki M. 2017. Two-Photon calcium imaging of the  
713 medial prefrontal cortex and hippocampus without cortical invasion. *Elife* **6**:1–20.

- 714 doi:10.7554/eLife.26839
- 715 König K, Becker TW, Fischer P, Riemann I, Halbhuber K-J. 1999. Pulse-length dependence of cellular  
716 response to intense near-infrared laser pulses in multiphoton microscopes. *Opt Lett* **24**:113.  
717 doi:10.1364/OL.24.000113
- 718 Lin MZ, Schnitzer MJ. 2016. Genetically encoded indicators of neuronal activity. *Nat Neurosci*  
719 **19**:1142–1153. doi:10.1038/nn.4359
- 720 Liu H, Deng X, Tong S, He C, Cheng H, Zhuang Z, Gan M, Li J, Xie W, Qiu P, Wang K. 2019. In Vivo Deep-  
721 Brain Structural and Hemodynamic Multiphoton Microscopy Enabled by Quantum Dots. *Nano*  
722 *Lett* **19**:5260–5265. doi:10.1021/acs.nanolett.9b01708
- 723 Low RJ, Gu Y, Tank DW. 2014. Cellular resolution optical access to brain regions in fissures: Imaging  
724 medial prefrontal cortex and grid cells in entorhinal cortex. *Proc Natl Acad Sci* **111**:18739–18744.  
725 doi:10.1073/pnas.1421753111
- 726 Macklin J, Harris T. 2016a. Linear optical properties and two-photon action cross sections for  
727 GCaMP6f and RCaMP1he.
- 728 Macklin J, Harris T. 2016b. Three-photon action spectra of GCaMP6f, and the absorption coefficient of  
729 water.
- 730 Odríguez CRR. 2018. Three-photon fluorescence microscopy with an axially elongated Bessel focus.  
731 *Opt Lett* **43**:1914–1917.
- 732 Olivíe G, Giguère D, Vidal F, Ozaki T, Kieffer J-C, Nada O, Brunette I. 2008. Wavelength dependence of  
733 femtosecond laser ablation threshold of corneal stroma. *Opt Express* **16**:4121.  
734 doi:10.1364/OE.16.004121
- 735 Ouzounov DG, Wang T, Wang M, Feng DD, Horton NG, Cruz-Hernández JC, Cheng Y-T, Reimer J, Tolia  
736 AS, Nishimura N, Xu C. 2017. In vivo three-photon imaging of activity of GCaMP6-labeled neurons  
737 deep in intact mouse brain. *Nat Methods* **14**:388–390. doi:10.1038/nmeth.4183
- 738 Ouzounov DG, Wang T, Wu C, Xu C. 2019. GCaMP6  $\Delta F/F$  dependence on the excitation wavelength in  
739 3-photon and 2-photon microscopy of mouse brain activity. *Biomed Opt Express* **10**:3343.  
740 doi:10.1364/BOE.10.003343
- 741 Perillo EP, Jarrett JW, Liu Y, Hassan A, Fernée DC, Goldak JR, Bonteanu A, Spence DJ, Yeh H, Dunn AK.  
742 2017. Two-color multiphoton in vivo imaging with a femtosecond diamond Raman laser. *Nat*  
743 *Publ Gr* 1–8. doi:10.1038/lsa.2017.95
- 744 Pilz G-A, Carta S, Stauble A, Ayaz A, Jessberger S, Helmchen F. 2016. Functional Imaging of Dentate  
745 Granule Cells in the Adult Mouse Hippocampus. *J Neurosci* **36**:7407–7414.  
746 doi:10.1523/JNEUROSCI.3065-15.2016
- 747 Podgorski K, Ranganathan G. 2016. Brain heating induced by near-infrared lasers during multiphoton  
748 microscopy. *J Neurophysiol* **116**:1012 LP – 1023.
- 749 Rowlands CJ, Park D, Bruns OT, Piatkevich KD, Fukumura D, Jain RK, Bawendi MG, Boyden ES, So PTC.  
750 2017. Wide-field three-photon excitation in biological samples. *Light Sci Appl* **6**:e16255-9.  
751 doi:10.1038/lsa.2016.255
- 752 So PTC, Dong CY, Masters BR, Berland KM. 2000. Two-photon excitation microscopy. *Annu Rev*  
753 *Biomed Eng* **2**:399–429. doi:10.1016/S1076-5670(03)80016-2
- 754 Sofroniew NJ, Flickinger D, King J, Svoboda K. 2016. A large field of view two-photon mesoscope with  
755 subcellular resolution for in vivo imaging. *Elife* **5**:1–20. doi:10.7554/eLife.14472
- 756 Stirman JN, Smith IT, Kudenov MW, Smith SL. 2016. Wide field-of-view, multi-region, two-photon  
757 imaging of neuronal activity in the mammalian brain. *Nat Biotechnol* **34**:857–862.  
758 doi:10.1038/nbt.3594
- 759 Stujenske JM, Spellman T, Gordon JA. 2015. Modeling the Spatiotemporal Dynamics of Light and Heat



- 760 Propagation for In Vivo Optogenetics. *Cell Rep* **12**:525–534. doi:10.1016/j.celrep.2015.06.036  
761 Takasaki K, Abbasi-Abl R, Waters J. 2019a. Superficial bound of the depth limit of 2-photon imaging in  
762 mouse brain. *bioRxiv* 618454. doi:10.1101/618454  
763 Takasaki K, Larkin J, Abbasi-asl R, Denman D, Millman D, Vries S De, Takeno M, Costa NM, Reid RC,  
764 Waters J. 2019b. 3-Photon Calcium Imaging of Deep Cortical Layers for Functional  
765 ConnectomicsBiophotonics Congress: Optics in the Life Sciences Congress  
766 (BODA,BRAIN,NTM,OMA,OMP). p. BM4A.4.  
767 Theer P, Denk W. 2006. On the fundamental imaging-depth limit in two-photon microscopy. *J Opt Soc*  
768 *Am A* **23**:3139–3149.  
769 Theer P, Hasan MT, Denk W. 2003. Two-photon imaging to a depth of 1000 microm in living brains by  
770 use of a Ti:Al<sub>2</sub>O<sub>3</sub> regenerative amplifier. *Opt Lett* **28**:1022–4.  
771 Tischbirek C, Birkner A, Jia H, Sakmann B, Konnerth A. 2015. Deep two-photon brain imaging with a  
772 red-shifted fluorometric Ca<sup>2+</sup> indicator. *Proc Natl Acad Sci* **112**:11377–11382.  
773 doi:10.1073/pnas.1514209112  
774 Tsai PS, Blinder P, Migliori BJ, Neev J, Jin Y, Squier JA, Klenfeld D. 2009. Plasma-mediated ablation: An  
775 optical tool for submicrometer surgery on neuronal and vascular systems. *Curr Opin Biotechnol*  
776 **20**:90–99. doi:10.1007/s11103-011-9767-z.Plastid  
777 Tschöp MH, Speakman JR, Arch JRS, Auwerx J, Brüning C, Chan L, Eckel RH, Jr RVF, Galgani JE, Hambly  
778 C, Herman MA, Horvath TL, Kahn BB, Sara C. 2013. A guide to analysis of mouse energy  
779 metabolism. *Nat Methods* **9**:57–63. doi:10.1038/nmeth.1806.A  
780 Wang M, Kim M, Xia F, Xu C. 2019. Impact of the emission wavelengths on in vivo multiphoton  
781 imaging of mouse brains. *Biomed Opt Express* **10**:1905–1918.  
782 Wang M, Wu C, Sinefeld D, Li B, Xia F, Xu C. 2018. Comparing the effective attenuation lengths for  
783 long wavelength in vivo imaging of the mouse brain. *Biomed Opt Express* **9**:3534.  
784 doi:10.1364/BOE.9.003534  
785 Wang T, Ouzounov DG, Wu C, Horton NG, Zhang B, Wu CH, Zhang Y, Schnitzer MJ, Xu C. 2018. Three-  
786 photon imaging of mouse brain structure and function through the intact skull. *Nat Methods*  
787 **15**:789–792. doi:10.1038/s41592-018-0115-y  
788 Weisenburger S, Tejera F, Demas J, Chen B, Manley J, Sparks FT, Martínez Traub F, Daigle T, Zeng H,  
789 Losonczy A, Vaziri A. 2019. Volumetric Ca<sup>2+</sup> Imaging in the Mouse Brain Using Hybrid  
790 Multiplexed Sculpted Light Microscopy. *Cell* 1–17. doi:10.1016/j.cell.2019.03.011  
791 Wilt BA, Fitzgerald JE, Schnitzer MJ. 2013. Photon shot noise limits on optical detection of neuronal  
792 spikes and estimation of spike timing. *Biophys J* **104**:51–62. doi:10.1016/j.bpj.2012.07.058  
793 Xiong B, Li A, Lou Y, Chen S, Long B, Peng J, Yang Z, Xu T, Yang X, Li X, Jiang T, Luo Q, Gong H. 2017.  
794 Precise Cerebral Vascular Atlas in Stereotaxic Coordinates of Whole Mouse Brain. *Front*  
795 *Neuroanat* **11**:1–17. doi:10.3389/fnana.2017.00128  
796 Xu C, Webb WW. 1997. Multiphoton Excitation of Molecular Fluorophores and Nonlinear Laser  
797 MicroscopyTopics in Fluorescence Spectroscopy, Vol. 5. Springer. p. 473.  
798 Yang W, Yuste R. 2017. In vivo imaging of neural activity. *Nat Methods* **14**:349–359.  
799 doi:10.1038/nmeth.4230  
800 Yildirim M, Sugihara H, So PTC, Sur M. 2019. Functional imaging of visual cortical layers and subplate  
801 in awake mice with optimized three-photon microscopy. *Nat Commun* **10**. doi:10.1038/s41467-  
802 018-08179-6  
803

804 **Appendix 1**

805 **Estimation of the Cross-over Depth Based on Fluorophore Cross Section**

806 The number of signal photons generated per excitation pulse at the focus can be calculated  
 807 according to equations (8) and (9), for 2PE and 3PE in a Gaussian beam focus respectively (Xu and  
 808 Webb, 1997):

$$2\text{PE signal photons per pulse} = \frac{S_{2P}}{f} = \frac{1}{2} \frac{g_p^{(2)}}{\tau} \phi C(\eta\sigma_2) n_0 \frac{\pi}{\lambda_{2P}} \left(\frac{P_{2P}}{f}\right)^2 \quad (8)$$

$$3\text{PE signal photons per pulse} = \frac{S_{3P}}{f} = \frac{1}{3} \frac{g_p^{(3)}}{\tau^2} \phi C(\eta\sigma_3) n_0 \frac{2\pi^2}{3\lambda_{3P}^3} \text{NA}^2 \left(\frac{P_{3P}}{f}\right)^3 \quad (9)$$

809 where  $g_p^{(n)}$  is the  $n$ th-order temporal coherence factor (we assume a Gaussian temporal profile of  
 810 the pulse);  $\tau$  is the laser pulse width;  $\phi$  is the system collection efficiency;  $C$  is the concentration of  
 811 the fluorophore;  $\eta\sigma_n$  is the  $n$ -photon action cross section;  $n_0$  is the refractive index of the medium;  
 812  $\lambda$  is the excitation wavelength in vacuum; NA is the numerical aperture defined by  $1/e^2$  beam  
 813 diameter at the objective back aperture;  $P_{2P}$  and  $P_{3P}$  are, respectively, the average power at the  
 814 focus for 2PE and 3PE in the unit of photons/s, and  $f$  the repetition rate.

815

816 At a typical signal yield for three-photon imaging at 0.1 photons detected per excitation pulse (i.e.

817  $S_{3P}/f = 0.1$ ), the required pulse energy at the focus (i.e.  $\frac{P_{3P}}{f} \cdot \frac{hc}{\lambda_{3P}}$ ) has been measured to be  $\sim 2$  nJ.

818 For the 2PE signal yield to be the same as 3PE (i.e.  $S_{2P}/f = 0.1$ ), the 2PE pulse energy at the focus

819 can be derived from equations (8) and (9):

$$\frac{P_{2P}}{f} = \sqrt{\frac{4\pi}{9} \frac{1}{\tau} \frac{g_p^{(3)}}{g_p^{(2)}} \frac{\sigma_3}{\sigma_2} \frac{\lambda_{2P}}{\lambda_{3P}^3} \text{NA}^2 \left(\frac{P_{3P}}{f}\right)^3} \quad (10)$$



820 For estimation, we use  $10^{-49} \text{ cm}^4 \text{ s/photons}$  and  $10^{-82} \text{ cm}^6 \text{ (s/photons)}^2$  for 2PE and 3PE action  
 821 cross sections, respectively, based on the typical values of fluorescent dyes and calcium indicators  
 822 (Cheng et al., 2014; Macklin and Harris, 2016a, 2016b). Evaluating equation (10) with all the  
 823 parameter values listed in Table S1, 2PE pulse energy (i.e.  $\frac{P_{2P}}{f} \cdot \frac{hc}{\lambda_{2P}}$ ) is solved to be 0.2 nJ. In other  
 824 words, the ratio of 3PE to 2PE pulse energy resulting in 0.1 photons detected per excitation pulse  
 825 is  $2 \text{ nJ}/0.2 \text{ nJ} = 10$  times, close to the 8x measured with GCaMP6s (Figure 1B). The ratio measured  
 826 with fluorescein is higher (15x) because fluorescein 3PE cross section at  $\sim 1320 \text{ nm}$  is noticeably  
 827 smaller than  $10^{-82} \text{ cm}^6 \text{ (s/photons)}^2$  and  $1320 \text{ nm}$  is likely not the peak 3PE wavelength for  
 828 fluorescein (Macklin and Harris, 2016b).

829 **Table S1. Two- and three-photon Excitation Parameters.**

|                | Objective<br>Lens Focal<br>Length (mm) | $1/e^2$ Beam Diameter<br>at the Back Aperture<br>(mm) | Effective<br>NA | Pulse<br>Duration<br>$\tau$ (fs) | $g_p^{(n)}$ |
|----------------|----------------------------------------|-------------------------------------------------------|-----------------|----------------------------------|-------------|
| 920 nm<br>2PE  | 7.2                                    | 11                                                    | 0.75            | 60                               | 0.66        |
| 1320 nm<br>3PE | 7.2                                    | 11                                                    | 0.75            | 60                               | 0.51        |

830  
 831 The cross-over depth is defined as the imaging depth where an equal amount of signal per pulse is  
 832 generated using the same pulse energy at the brain surface for 1320-nm 3PE and 920-nm 2PE.  
 833 Based on the ratio of 3PE to 2PE pulse energy and the EALs at 1320 nm and 920 nm, the cross-  
 834 over depth can be readily calculated by solving for  $z$  in equation (11):

$$\frac{\text{3PE pulse energy at the focus}}{\text{2PE pulse energy at the focus}} = \frac{\text{surface 3PE pulse energy} \times \exp[-z/l_e(1320\text{nm})]}{\text{surface 2PE pulse energy} \times \exp[-z/l_e(920\text{nm})]} \quad (11)$$

835 For example, with  $l_e$  (1320nm) = 293  $\mu\text{m}$ , and  $l_e$  (920nm) = 154  $\mu\text{m}$  (Figure 1B), and the pulse  
836 energy ratio of 8 for GCaMP6s, the cross-over depth  $z$  is solved to be 675  $\mu\text{m}$ . If the pulse energy  
837 ratio of 15 for fluorescein is used, the cross-over happens at 880  $\mu\text{m}$ .

838

839 The ratio of 3PE to 2PE pulse energy can also be used to calculate the 3PE cross section based on  
840 the known 2PE cross section of the same fluorescent molecule. From Eq. (12), the ratio of 3PE to  
841 2PE cross section can be expressed as:

$$\frac{\sigma_3}{\sigma_2} = \frac{9}{4\pi} \tau \frac{g_p^{(2)}}{g_p^{(3)}} \frac{(\lambda_{3P})^3}{\lambda_{2P}} \frac{1}{\text{NA}^2} \left(\frac{P_{2P}}{P_{3P}}\right)^2 \left(\frac{P_{3P}}{f}\right)^{-1} \quad (12)$$

842 Eq. (12) shows the advantage of such a ratiometric measurement since there is no need to  
843 estimate the intracellular dye concentration  $C$  or system collection efficiency  $\phi$ . Given the  
844 measured 2PE action cross section of GCaMP6s around 920 nm ( $\sim 2 \times 10^{-49}$   $\text{cm}^4\text{s}$  with saturated  
845  $\text{Ca}^{2+}$ ) (Dana et al., 2016), 3PE action cross section of GCaMP6s at 1320 nm is estimated to be  
846  $\sim 3 \times 10^{-82}$   $\text{cm}^6\text{s}^2$ . This result is close to the 3PE action cross section of GCaMP6f measured in an  
847 independent study ( $1.9 \times 10^{-82}$   $\text{cm}^6\text{s}^2$  with saturated  $\text{Ca}^{2+}$ ) (Macklin and Harris, 2016b).
